# Supplementary material for: Clinician perceptions of a prototype wearable exercise biofeedback system for orthopaedic rehabilitation: a qualitative exploration
Source: PubMed Central journal article supplement — BMJ Open. 2018 Oct 25;8(10):e026326. doi: 10.1136/bmjopen-2018-026326 (PMC6224760; doi:10.1136/bmjopen-2018-026326), 2018-10-25
Supplement: bmjopen-2018-026326.draft_revisions.pdf [file bmjopen-2018-026326.draft_revisions.pdf]

# BMJ Open

BMJ Open is committed to open peer review. As part of this commitment we make the peer review history of every article we publish publicly available.

When an article is published we post the peer reviewers' comments and the authors' responses online. We also post the versions of the paper that were used during peer review. These are the versions that the peer review comments apply to.

The versions of the paper that follow are the versions that were submitted during the peer review process. They are not the versions of record or the final published versions. They should not be cited or distributed as the published version of this manuscript.

BMJ Open is an open access journal and the full, final, typeset and author-corrected version of record of the manuscript is available on our site with no access controls, subscription charges or pay-per-view fees (<http://bmjopen.bmj.com>).

If you have any questions on BMJ Open's open peer review process please email [info.bmjopen@bmj.com](mailto:info.bmjopen@bmj.com)

# BMJ Open

## Clinician perceptions of a prototype wearable exercise biofeedback system for orthopaedic rehabilitation: a qualitative exploration.

|                               |                                                                                                                                                                                                                                                                                                                                                                                                                                                                                      |
|-------------------------------|--------------------------------------------------------------------------------------------------------------------------------------------------------------------------------------------------------------------------------------------------------------------------------------------------------------------------------------------------------------------------------------------------------------------------------------------------------------------------------------|
| Journal:                      | <i>BMJ Open</i>                                                                                                                                                                                                                                                                                                                                                                                                                                                                      |
| Manuscript ID                 | bmjopen-2018-026326                                                                                                                                                                                                                                                                                                                                                                                                                                                                  |
| Article Type:                 | Research                                                                                                                                                                                                                                                                                                                                                                                                                                                                             |
| Date Submitted by the Author: | 28-Aug-2018                                                                                                                                                                                                                                                                                                                                                                                                                                                                          |
| Complete List of Authors:     | Argent, Rob; Beacon Hospital, ; University College Dublin, Insight Centre for Data Analytics<br>Slevin, Patrick; University College Dublin, Insight Centre for Data Analytics<br>Bevilacqua, Antonio; University College Dublin, Insight Centre for Data Analytics<br>Neligan, Maurice; Beacon Hospital<br>Daly, Ailish; Beacon Hospital<br>Caulfield, Brian; University College Dublin, Insight Centre for Data Analytics; University College Dublin, Institute of Sport and Health |
| Keywords:                     | biofeedback, biomedical technology, exercise therapy, mobile health, QUALITATIVE RESEARCH, ORTHOPAEDIC & TRAUMA SURGERY                                                                                                                                                                                                                                                                                                                                                              |
|                               |                                                                                                                                                                                                                                                                                                                                                                                                                                                                                      |

SCHOLARONE™  
Manuscripts

Peer Review Only

1  
2  
3  
4  
5  
6  
7  
8  
9  
10  
11  
12  
13  
14  
15  
16  
17  
18  
19  
20  
21  
22  
23  
24  
25  
26  
27  
28  
29  
30  
31  
32  
33  
34  
35  
36  
37  
38  
39  
40  
41  
42  
43  
44  
45  
46  
47  
48  
49  
50  
51  
52  
53  
54  
55  
56  
57  
58  
59  
60

1 Original Paper

2 Clinician perceptions of a prototype wearable exercise  
3 biofeedback system for orthopaedic rehabilitation: a qualitative  
4 exploration.

5  
6 Rob Argent<sup>1,2,3</sup>  
7 Patrick Slevin<sup>2,3</sup>  
8 Antonio Bevilacqua<sup>2</sup>  
9 Maurice Neligan<sup>1</sup>  
10 Ailish Daly<sup>1</sup>  
11 Brian Caulfield<sup>2,3</sup>

- 12  
13 1. Beacon Hospital, Dublin, Ireland  
14 2. Insight Centre for Data Analytics, University College Dublin, Ireland  
15 3. School of Public Health, Physiotherapy and Sport Science, University College Dublin,  
16 Ireland

17  
18 Corresponding Author:  
19 Rob Argent  
20 UCD Beacon Hospital Academy  
21 Beacon Hospital  
22 Sandyford  
23 Dublin 18  
24 Ireland

25  
26 Phone: +353 (0)1 6504646  
27 Email: [rob.argent@insight-centre.org](mailto:rob.argent@insight-centre.org)  
28  
29

30  
31 Word count: 3986  
32  
33  
34  
35  
36  
37  
38  
39  
40

## 41 Original Paper

# 42 Clinician perceptions of a prototype wearable exercise 43 biofeedback system for orthopaedic rehabilitation: a qualitative 44 exploration.

### 46 Abstract

47 **Objectives:** To explore the opinions of orthopaedic healthcare professionals regarding the  
48 opportunity and challenges of using wearable technology in rehabilitation, and understand  
49 the perceived impact of an exemplar exercise biofeedback system that incorporates  
50 wearable sensing, involving the clinician in the user-centred design process.

51 **Design:** A qualitative study consisting of one-to-one semi-structured interviews, including a  
52 demonstration of a prototype wearable exercise biofeedback system. Interviews were audio  
53 recorded and transcribed, with thematic analysis conducted of all transcripts.

54 **Setting:** The study was conducted in the orthopaedic department of an acute private  
55 hospital.

56 **Participants:** Ten clinicians from a multidisciplinary team of healthcare professionals  
57 involved in the orthopaedic rehabilitation pathway participated in the study.

58 **Results:** Findings suggest that there is currently a challenge in gathering timely and  
59 objective data for monitoring of patients in orthopaedic rehabilitation. Whilst there are  
60 challenges in the design and implementation of biofeedback systems, clinicians perceive  
61 significant value in the use of wearable biofeedback systems such as the exemplar  
62 demonstrated for use following total knee replacement.

63 **Conclusions:** Clinicians see an opportunity for wearable technology to continuously track  
64 data in real-time, and feel that feedback provided to users regarding exercise technique and  
65 adherence can further support the patient at home. There was perceived value in the  
66 prototype system demonstrated to participants which supports the ongoing development of  
67 such exercise biofeedback platforms.

### 69 Keywords

70 biofeedback; biomedical technology; exercise therapy; orthopedics; mobile health;  
71 qualitative

### 73 Strengths and limitations of this study

- 74 - There is a need for innovative solutions to counteract poor adherence and increasing  
75 pressure on patient self-management, and a user-centred design approach with key  
76 stakeholders is recommended.
- 77 - Few studies have investigated clinicians' perceptions of exercise biofeedback  
78 systems and offered the opportunity for healthcare professionals to contribute to  
79 the user-centred design process.
- 80 - This study uses qualitative methods to allow for an in-depth exploration of  
81 participant opinions, yet results are of a subjective nature and are not necessarily  
82 generalisable.
- 83 - Study participants were recruited from a number of different disciplines across  
84 nursing and therapies, although from a single healthcare institution.

## 86 Introduction

87 It has been estimated over 10% of the population will need a total knee replacement (TKR)  
88 by eighty years of age [1]. Home-based exercises following TKR form the mainstay of  
89 rehabilitation, with typical physiotherapy programmes consisting of exercises targeted to  
90 increase strength, range of movement and function, as well as reduce post-operative  
91 complications [2]. However, adherence rates to home-based exercises are alarmingly low,  
92 with patients reporting various reasons for non-compliance with the prescribed programme  
93 [3, 4]. Patients often report a lack of confidence following discharge from hospital,  
94 insecurity surrounding their post-operative expectations, and poor recall of exercise  
95 technique [5]. Poor performance of exercise technique such as insufficient range of motion,  
96 alignment, or compensatory movements may impact on the efficacy of the rehabilitation  
97 programme, and hence the outcome of the procedure [6]. Poor adherence may even lead to  
98 further complications, readmission to hospital, additional healthcare costs and prolonged  
99 pain and disability for the patient [7].

100  
101 The lack of support reported by patients may also result from the changing nature of joint  
102 replacement surgery globally, moving towards value-based care and a drive for reduction in  
103 the length of hospital stay, placing a greater emphasis than ever on the self-management  
104 skills of the patient. Healthcare providers need to make the most of the opportunity that  
105 new and emerging technologies present [1, 8], and connected health solutions may provide  
106 the opportunity to bridge this gap between the home and clinician [3]. With the  
107 advancement of sensor technologies and mobile computing platforms, it is now possible to  
108 empower patients to self-manage more effectively, acquire data with far greater efficiency,  
109 and use this to support the clinician in making more objective, data-driven decisions about  
110 clinical care [8]. Inertial measurement units (IMUs) can be used to measure the three-  
111 dimensional position of a limb segment and have been shown to be a cost-effective,  
112 accurate method of assessing exercise technique in rehabilitation exercises [9–12],  
113 presenting the opportunity to build such a classification system into a connected health  
114 intervention.

115  
116 When designing a connected health intervention, in order to promote user-engagement and  
117 maximise impact, an iterative design process involving consultation with key stakeholders is  
118 recommended throughout the design and development phase to optimise the effectiveness  
119 of the system [13, 14]. As well as the end-user, clinicians should be encouraged to  
120 participate in the design and evaluation of connected health solutions to ensure clinical  
121 acceptability [15]. However, few studies have assessed the opinions of clinicians regarding  
122 wearable technology [16], or have provided the opportunity for rehabilitation professionals  
123 to offer feedback in the design process of such systems.

124  
125 The aim of this study was two-fold. In the first instance we sought to perform an exploration  
126 of clinicians' perceptions of wearable technology, the opportunities that this technology  
127 may provide in their area of expertise, and to identify what methods are currently employed  
128 in clinical practice to provide monitoring and feedback of patients following knee  
129 replacement surgery. Following this, clinicians were provided with a demonstration of a  
130 prototype system for exercise biofeedback after TKR, and their perceptions of its potential  
131 use in the clinical setting were evaluated.

132

## 133 Methods

### 134 Patient and Public Involvement

135 No patients or members of the general public were involved in this study.

136

### 137 Participants

138 A total of 10 participants (6 females, 4 males, age: 36.5 [SD 9.06]) from a variety of clinical  
139 disciplines (4 Physiotherapists, 2 Clinical Nurse Specialists, 2 Orthopaedic Assistants, 1  
140 Occupational Therapist and 1 Staff Nurse) were recruited from a private hospital in Dublin,  
141 Ireland, and were involved in the care of patients in the orthopaedic joint replacement  
142 pathway within the hospital. Each participant signed a consent form prior to commencing  
143 the study, and the study protocol was approved by the Beacon Hospital Research Ethics  
144 Committee.

145

### 146 Experimental Procedure

147 Participants were required to attend a single hour-long session as part of the study. All  
148 interview data were recorded using a Dictaphone and an interview topic guide  
149 (Supplemental File 1) was constructed based on the main research questions and aims of  
150 the study, in order to ensure consistency between interviews [17]. Prior to introducing the  
151 concept and exemplar biofeedback system, and to prevent bias, a semi-structured interview  
152 was conducted with each participant to gain an understanding of what methods clinicians  
153 are currently using to monitor and provide feedback to patients, the perceived  
154 opportunities and challenges of connected health interventions, and their current  
155 knowledge of wearable technology. A demonstration of the exemplar wearable exercise  
156 biofeedback system was then provided, followed by a further semi-structured interview to  
157 identify the perceived impact and clinical implications of such a system.

158

### 159 Prototype Exercise Biofeedback System

160 A prototype has been developed consisting of a single IMU (Shimmer, Dublin, Ireland) and  
161 an Android application developed for a tablet computer to be used by the patient in their  
162 own home. The IMU is placed on the shin in a neoprene sleeve and is connected via  
163 Bluetooth to the Android application on the tablet. As the user exercises, the IMU streams  
164 sensor data to the tablet, and an on-screen avatar mirrors the movements and the  
165 repetitions are counted for each exercise. At the end of the set, the user is provided with  
166 feedback on their technique [11, 18], and if erroneous, advice on how to improve technique  
167 is displayed. Patient reported outcomes are captured on a regular basis and the user's  
168 progress is also presented graphically to track adherence. An illustration of the user setup is  
169 included in figure 1 with screenshot in figure 2.

170

171 Figure 1: User setup of biofeedback system with single IMU placed on the shin and  
172 associated tablet application.

173

174

175 Figure 2: Screenshot of Android application during exercise mode.

176

### 177 Data Analysis

178 Audio from interview recordings was transcribed and anonymised. Thematic analysis of the  
179 interview transcript took place with a grounded-theory approach [17]. The interview guide

1  
2  
3 180 was used to create an early coding template, which then developed and refined sub-themes  
4 181 following further data analysis, conducted by RA (Research Physiotherapist) and PS  
5 182 (Experienced Qualitative Researcher) [19]. A constant comparison approach was taken with  
6 183 regular cross-checking to ensure reliability of emerging sub-themes with a strong correlation  
7 184 between researchers [20]. Any outliers were discussed, and agreement reached, with data  
8 185 saturation agreed when no further themes were occurring in the interview data [17].  
9 186

## 11 187 Results

12 188 A summary of results are reported below, additional quotations to support these results can  
13 189 be found in Supplemental File 2.  
14 190

### 16 191 Current Methods of Monitoring & Feedback

17 192 Clinical practice at present tends to rely on a combination of objective and subjective  
18 193 markers. Participants spoke about the wide-use of range of motion measurement as a key  
19 194 objective marker following TKR. Additionally, markers such as swelling, pain and functional  
20 195 scores are used to monitor changes in the patient's condition.  
21 196

22 197 *Generally, I would manually take objective measures, traditional measures such as*  
23 198 *muscle strength, range of motion, and then some subjective ones as well, opinion*  
24 199 *based on movement quality. [Physiotherapist]*  
25 200

26 201 However, participants commented on the lack of objectivity of assessing muscle strength,  
27 202 gait and exercise technique, with visual assessment and patient self-report forming the basis  
28 203 for ongoing monitoring.  
29 204

30 205 *Objective markers are few and far between and we're still reliant on the old clinical*  
31 206 *measures like range of motion, muscle strength - which if you're testing on an Oxford*  
32 207 *scale it's a very subjective thing. [Physiotherapist]*  
33 208

34 209 Those participants working in the post-acute phase of care stated that feedback was  
35 210 primarily offered verbally, and it is not possible to offer other feedback between clinic  
36 211 appointments.  
37 212

38 213 *I guess just verbal feedback is our only option... but when they go home we're not*  
39 214 *giving them any feedback 'til they come back to the clinic. [Physiotherapist]*  
40 215

### 42 216 Perceptions & Knowledge of Wearables

43 217 Participants were aware of wearable technology, with many stating they have used some  
44 218 sort of wearable device in their personal lives, yet discussion was almost exclusively on the  
45 219 application in the fitness space.  
46 220

47 221 *The apps on the smartphone that you have to have a phone in your pocket for the*  
48 222 *app to work and it tracks how many steps you've done... I know about Fitbit. [Clinical*  
49 223 *Nurse Specialist]*  
50 224

1  
2  
3 225 Participants also discussed the motivational aspect associated with using a wearable device.  
4 226 They felt that as well as motivating the user to meet their goals, the opportunity to track  
5 227 their own data and analyse their results was of benefit.

6 228

7 229 *You kind of got little rewards or prompts from it you know, 'congratulations you've*  
8 230 *done 5 days in a row' and I liked that. [Occupational Therapist]*

9 231

10 232 Drawbacks of such technology were also highlighted. One participant felt that it would not  
11 233 be beneficial for them to use wearables themselves, with others reporting the amount of  
12 234 choice being overwhelming, and questioning the validity of such measures.

13 235

14 236 *How can it differentiate between height and weight, and I don't know that is always*  
15 237 *taken into account with some of these technologies. [Clinical Nurse Specialist]*

16 238

### 19 239 Opportunities & Challenges for Connected Health in Orthopaedic Rehabilitation

20 240 Participants were unanimous in agreement that there is an opportunity and wide scope for  
21 241 connected health interventions, including wearable and mobile technology, to play a role in  
22 242 orthopaedic rehabilitation.

23 243

24 244 *I think there's definitely a place for it, because it's so much more in people's lives*  
25 245 *than ever. Lots of people like apps now and they like to tag into something, and if it*  
26 246 *can give more specific individual feedback then there's definitely a role for it to be a*  
27 247 *part of their progression, especially resulting in something that will rehab for months.*  
28 248 [Physiotherapist]

29 249

30 250 A number of potential features were highlighted that clinicians would consider useful, such  
31 251 as progress tracking, feedback, remote monitoring, regular range of motion measurement,  
32 252 and counting repetitions.

33 253

34 254 *Even something like a Fitbit that showed a graph that you can go and check if they've*  
35 255 *actually done their exercise and if they've achieved their targets. [Staff Nurse]*

36 256

37 257 *I love the idea of real-time feedback, the idea something can tell you you're doing*  
38 258 *something wrong immediately and help you correct it. [Occupational Therapist]*

39 259

40 260 Participants were also quick to point out the challenges of delivering healthcare solutions in  
41 261 this way. All participants interviewed stated that the usability of any technology would be a  
42 262 significant barrier to engagement that will need to be overcome.

43 263

44 264 *I mean if the interface is difficult or if something, if errors keep occurring. I think the*  
45 265 *more simple a thing is and the more intuitive it is, the easier it will be from an uptake*  
46 266 *and ongoing compliance issue. [Occupational Therapist]*

47 267

48 268 Compliance with use of any connected health intervention was widely reported to be a  
49 269 challenge.

50 270

51 271

52 272

53 273

54 274

55 275

56 276

57 277

58 278

59 279

60 280



1  
2  
3 271 *I think there are an awful lot of opportunities there but a lot of it comes down to*  
4 272 *patient compliance.* [Clinical Nurse Specialist]

5 273

6 274 There were additional challenges relating to the reliability and validity of any such  
7 275 technology, with discussion of aspects such as internet capability, bugs and glitches.

8 276

9 277 *The technology actually working, how many times you know, the lack of Wi-Fi,*  
10 278 *computer crashing... I suppose they would be the huge elements.* [Clinical Nurse  
11 279 Specialist]

12 280

13 281 Data security challenges were also noted, with the potential for confidential healthcare data  
14 282 being accessed without permission.

15 283

16 284 *One would have said data protection, that's always going to be your main challenge.*  
17 285 [Clinical Nurse Specialist]

18 286

19 287 Participants also spoke of the important balance in the patient-clinician relationship, and  
20 288 the need for technology to enhance the role of the professional, rather than attempt to  
21 289 replace the clinician. It was noted that such technologies need to work without shifting the  
22 290 focus away from the patient's own self-management.

23 291

24 292 *So I would think with technology the person who has to be driving the connection is*  
25 293 *the patient.* [Clinical Nurse Specialist]

26 294

27 295 The final notable sub-theme to arise when discussing challenges of connected health  
28 296 systems, is the user's own ability and confidence with technology.

29 297

30 298 *If you look at the elderly population that are primarily receiving joint replacements,*  
31 299 *are a lot of them au fait with? Some of them would be but presumably there are a*  
32 300 *large percentage who aren't au fait with iPads, iPhone and similar technologies.*  
33 301 [Physiotherapist]

34 302

35 303 However other participants offered counter arguments that this may not be the case  
36 304 compared to years gone by.

37 305

38 306 *I suppose, a lot of people have the technology, that's not as much a barrier. It's so*  
39 307 *accessible now on smartphones and so many people have smartphones... I'm seeing*  
40 308 *90-year olds using Skype and Facebook and I think that barrier is reducing.*  
41 309 [Occupational Therapist]

42 310

### 43 311 Perceived Impact of Exemplar System

44 312 Having completed a demonstration of the prototype exercise biofeedback system as  
45 313 described above, all participants perceived this system as potentially having a positive  
46 314 impact in orthopaedic rehabilitation. Every participant noted the ability to capture and track  
47 315 data in a manner that has not previously been possible as a major benefit. Participants were  
48 316 excited by the prospect of tracking and leveraging metrics such as adherence, difficulty, pain  
49 317 and mood to guide their decisions.

1  
2  
3 318  
4 319 *Then at least you can track as well, to see if they're actually using it at all. Because if*  
5 320 *they're not using it then they're likely not doing anything. [Physiotherapist]*  
6 321

7 322 *One of my favourite things about it is that you can score the difficulty, if somebody is*  
8 323 *scoring 5,5,5 then they're finding it too difficult but if they're scoring 1,1,1 you can*  
9 324 *progress them on very quickly. [Physiotherapist]*  
10 325

11 326 They also felt using this system would improve the outcome of rehabilitation. They  
12 327 suggested that if the patient was demonstrating greater adherence, this would be of  
13 328 benefit.  
14 329

15 330 *It'll improve the quality of the patient's rehab. So I think they will be more likely to*  
16 331 *follow more structured programmes when they have the visual feedback to do it.*  
17 332 *[Physiotherapist]*  
18 333

19 334 *I think they would rehab quicker and be more confident in their rehab, which is the*  
20 335 *best thing. [Staff Nurse]*  
21 336

22 337 Through instilling added reassurance and motivation, clinicians felt that this system could  
23 338 improve the patient experience.  
24 339

25 340 *I think it will enhance patient confidence in their recovery... it's reassuring to know*  
26 341 *you're on track. [Clinical Nurse Specialist]*  
27 342

28 343 Participants suggested this system could contribute to a more efficient healthcare system,  
29 344 both for the patient and the service provider.  
30 345

31 346 *... you're hopefully not going to need MUA's (Manipulation under anaesthetic) and*  
32 347 *that kind of thing because you're doing it right from the beginning. [Staff Nurse]*  
33 348

34 349 *As a patient, I would imagine that if I was doing my exercises correctly, I would need*  
35 350 *less appointment time with a physiotherapist... If I wasn't doing the exercises*  
36 351 *correctly, the physiotherapist might call me to go through how to do it, but if I'm*  
37 352 *doing my exercises correctly, if I'm reaching the goals I need to and the activity levels*  
38 353 *that I need to, why do I need to come in and see a physio? [Clinical Nurse Specialist]*  
39 354

## 355 Challenges

356 Participants also felt that this increased efficiency could emerge as a challenge however, as  
357 357 there is a risk of the patient placing a reliance on the technology over the human. Although  
358 358 there was an acknowledgement from some that this would not be the case.  
359 359

360 360 *As long as I follow it... I wouldn't go and see the physio again. [Orthopaedic*  
361 361 *Assistant]*  
362 362

1  
2  
3 363 *It's not going to take the place of the therapist you know, but it just serves to really*  
4 364 *hammer home the message you're trying to get across to the patient.*  
5 365 [Physiotherapist]

6 366

7 367 A major challenge for such a system which was discussed by five clinicians, related to the  
8 368 accuracy of the data provided by the technology.

9 369

10 370 *The worry that it won't be giving you the right information and then it's going to*  
11 371 *skew your thought process and that of others because you can only report on what*  
12 372 *you're being given. [Physiotherapist]*

13 373

14 374 Interviews highlighted the difficulty of tailoring an automated programme to the individual,  
15 375 with only a small number of standard exercises included in this system compared to the  
16 376 breadth of options prescribed in clinical practice.

17 377

18 378 *My issue would be if we use this app after two weeks should we not be progressing*  
19 379 *their exercises so you're no longer going to be performing those exercises.*  
20 380 [Physiotherapist]

21 381

22 382 An interesting discussion evolved with a number of participants relating to what a system  
23 383 such as this would do for the responsibility of care, with some clinicians stating that they  
24 384 feel no amount of technology will promote self-management.

25 385

26 386 *Some people would see that as a tool for assisting self-management, other people no*  
27 387 *matter how much education or technology you provide, will still see their recovery as*  
28 388 *incumbent on the healthcare professional looking after them. [Clinical Nurse*  
29 389 *Specialist]*

30 390

31 391 One feature of the remote monitoring aspect of the prototype system is to send an alert to  
32 392 the clinician if there is a concerning change in the data, but some participants stated that  
33 393 the responsibility of the clinician would have to be clearly defined in this instance, in order  
34 394 not to detract from the patient's own self-management.

35 395

36 396 *I guess it depends who is responsible for their care... I wouldn't want alerts about*  
37 397 *patients who went home a week ago but are in 10/10 pain. I want to educate that*  
38 398 *patient and put that responsibility on them, the more we give patients the*  
39 399 *responsibility the better. By doing that alert it makes the patient more passive and*  
40 400 *we want to encourage the patient to take responsibility, educate them on taking*  
41 401 *steps like icing and taking pain medication, and then if it still doesn't settle down,*  
42 402 *then the patient needs to call. I think if we put the responsibility onto us we're*  
43 403 *leading down a dangerous path. [Physiotherapist]*

44 404

## 405 Discussion

### 406 Principal Findings

407 This study has found that clinicians see technology as having the potential to improve and  
408 assist the rehabilitation process, but there are numerous challenges involved in designing  
409 such solutions. Clinicians highlighted a need for a solution which deals with the issue of

1  
2  
3 410 exercise adherence and lack of support for patients at home [4, 5]. When presented with a  
4 411 demonstration of the prototype system, all participants felt that this type of technology has  
5 412 the potential to positively impact on the outcomes of orthopaedic rehabilitation. There was  
6 413 strong interest in the opportunity to track data and maximise the effectiveness of  
7 414 rehabilitation, yet it was felt that such systems can undergo further iterations to extend this  
8 415 impact.

9 416  
10  
11 417 Current clinical practice provides little opportunity for monitoring or feedback outside of the  
12 418 clinic. Patients with negative experiences of TKR have unmet needs regarding support and  
13 419 managing expectations [21], yet there is a heavy reliance on the patient's self-motivation at  
14 420 home. It was perceived by the participants that wearable devices offer the opportunity to  
15 421 improve self-motivation and achievement of goals through increased engagement.  
16 422 Participants also reported using a combination of objective and subjective outcome  
17 423 measures for monitoring, yet these measures are only captured at limited time-points and  
18 424 self-reported measures such as adherence can be unreliable [3, 22]. The results from this  
19 425 study would suggest there is benefit in capturing further objective outcome measures, such  
20 426 as movement quality, or accurate monitoring of range of movement and adherence  
21 427 remotely.

22 428  
23  
24 429 The findings suggest potential implementation challenges such as usability, data protection  
25 430 and reliability which are known to be problematic, with further investigation required [23–  
26 431 25]. Many researchers are investigating the technical feasibility of using wearable sensing  
27 432 systems to support rehabilitation [26–29], yet few have explored the opinions of the end-  
28 433 user to evaluate and guide the design of such systems [30]. This study builds on Papi et al's  
29 434 work [16] by going on to offer an exemplar biofeedback system for evaluation, and including  
30 435 the clinician in the user-centred design process.

31 436

### 32 437 **Prototype System Evaluation**

33 438 Most clinicians believed the demonstrated prototype would improve the quality of patient  
34 439 rehabilitation, and therefore the outcome of surgery, whilst many were excited by the  
35 440 opportunity to capture data in a more objective and timely manner than current practice. It  
36 441 is perceived that this system could increase adherence to exercise programmes by using  
37 442 evidence based interventions discussed in the literature to improve adherence in an  
38 443 automated manner [3, 31–33]. Interestingly, several participants felt this system had the  
39 444 potential to improve the efficiency of the healthcare system, by harnessing the data  
40 445 collected to make better use of appointment scheduling, which has been highlighted as a  
41 446 design requirement by healthcare professionals previously [15, 16]. Published research has  
42 447 shown the ability of IMU based systems to record and classify exercise technique [11, 18],  
43 448 and this study has highlighted the clinical applications of such work.

44 449

### 45 450 **Challenges**

46 451 There are however concerns that such a system could lead to a reliance on technology,  
47 452 rather than the clinician, but with design refinements and appropriate training, this tool has  
48 453 the ability to augment the clinician's decision-making process rather than seek to replace  
49 454 the human expert. There was also concern that this system might increase the responsibility  
50 455 clinicians have for their patients by sending alerts. Yet arguably, such a system may illustrate  
51 456 shortcomings in current practice, with a user who has not received sufficient education

52 457  
53 458  
54 459  
55 460

1  
2  
3 457 regarding pain or management being highlighted. A clinician may consider a user educated  
4 458 in self-management and not wish for alerts, yet if this user continues to report severe  
5 459 symptoms, either the success of education is questionable or further assessment is  
6 460 required. When developing such systems, there is also a need to allow for customisation of  
7 461 exercise programmes from the clinician, with participants highlighting the variance between  
8 462 individuals, the need for a larger exercise library, and the desire to choose when  
9 463 progressions should be offered. The major challenge in the development of such a support  
10 464 system which harnesses machine learning technology including repetition counting and  
11 465 technique feedback is in ensuring the accuracy and reliability of the information provided to  
12 466 users. Clinicians were concerned that inaccuracy can lead to a lack of trust in the system,  
13 467 and has the potential to negatively impact user engagement. This study has shown the need  
14 468 for clear and transparent real-world validation and end-user evaluation of any such system  
15 469 prior to implementation, an aspect that is lacking in the current literature [25, 30].  
16  
17  
18

### 19 471 Limitations

20 472 Due to the qualitative nature of this study, there are number of factors to consider when  
21 473 reviewing this research. All participants were provided with a demonstration of the  
22 474 prototype system on one occasion only. It is quite possible that with ongoing use, or given  
23 475 further time to reflect on the system, the participant's opinions may change. It is important  
24 476 to highlight that these results relate to perceived impact solely from the participants' own  
25 477 opinions, and in order to determine the objective clinical impact of such a system, further  
26 478 research needs to take place in the form of a longitudinal study assessing a variety of clinical  
27 479 outcomes. This sample was selected from a single institution in the private healthcare  
28 480 sector, and whilst this sample comes from a cross-section of the multidisciplinary team, it  
29 481 does not guarantee that the opinions provided reflect the wider population of rehabilitation  
30 482 professionals. Despite these limitations, this paper provides evidence to support the need,  
31 483 ongoing design and development, and use of such systems in clinical practice.  
32  
33  
34

### 35 485 Future Work

36 486 Having now understood that there is a positive perceived impact for this system, future  
37 487 work will seek to deploy the platform as part of a pilot study with patients following TKR  
38 488 surgery. This work will seek to answer some of the questions posed by participants in this  
39 489 study relating to usability and engagement, while including the patient as well as the  
40 490 clinician in the design process to develop further iterations, prior to objective assessment of  
41 491 clinical impact and real-world validation.  
42  
43

### 44 493 Conclusions

45 494 Rehabilitation following joint replacement is complex and varied, yet there is a reliance on  
46 495 the patient's own self-management and motivation to maximise the effect of the home  
47 496 exercise programme, with little opportunity for expert monitoring, assessment or feedback  
48 497 outside of the clinic setting. A prototype system for interactive exercise biofeedback  
49 498 consisting of a single wearable sensor and an Android application was perceived to  
50 499 potentially have a positive impact on the rehabilitation of patients following knee  
51 500 replacement surgery. Clinicians were excited by the opportunity to continuously track data  
52 501 in real-time, and felt the exercise technique and adherence feedback would further support  
53 502 the patient in the home environment. Such systems need to be evaluated by clinicians as  
54  
55  
56  
57  
58  
59  
60

1  
2  
3 503 well as patients as the end-users, alongside real-world validation of the technical aspects of  
4 504 any such platforms.

5 505

### 6 506 Contributorship

7 507 RA, PS, AD and BC conceived and designed the study. RA conducted the recruitment and  
8 508 data collection with the assistance of PS, AD and MN. AB contributed to the development  
9 509 of the prototype biofeedback system. RA and PS conducted the data analyses and drafted  
10 510 and revised the manuscript. All authors read and approved the final manuscript.

11 511

### 12 512 Competing Interests

13 513 The authors declare that there is no conflict of interest.

14 514

### 15 515 Funding

16 516 This project forms part of the CHES (Connected Health Early Stage Researcher Support  
17 517 System) Innovation Training Network and has received funding from the European Union's  
18 518 Horizon 2020 research and innovation programme under the Marie Skłodowska-Curie grant  
19 519 agreement No. 676201.

20 520

### 21 521 Acknowledgements

22 522 The authors wish to acknowledge Tahar Kechadi for his assistance in the development of the  
23 523 prototype biofeedback system.

24 524

### 25 525 Ethical Approval

26 526 The research ethics committee of Beacon Hospital approved this study (REF: BEA0065).

27 527

### 28 528 Data Sharing

29 529 No additional data available.

30 530

### 31 531 References

32 532

- 33 533 [1] Kremers HM, Larson DR, Crowson CS, et al. Prevalence of total hip and knee  
34 534 replacement in the United States. *J Bone Jt Surg Am* 2015; 97: 1386–9355.
- 35 535 [2] American Academy of Orthopaedic Surgeons. Total Knee Replacement Exercise  
36 536 Guide, <http://orthoinfo.aaos.org/topic.cfm?topic=a00301> (2017, accessed 24 May  
37 537 2018).
- 38 538 [3] Argent R, Daly A, Caulfield B. Patient Involvement With Home-Based Exercise  
39 539 Programs: Can Connected Health Interventions Influence Adherence? *JMIR mHealth*  
40 540 *uHealth* 2018; 6: e47.
- 41 541 [4] Bassett SF. The assessment of patient adherence to physiotherapy rehabilitation.  
42 542 *New Zeal J Physiother* 2003; 31: 60–66.
- 43 543 [5] Perry MA, Hudson HS, Meys S, et al. Older adults' experiences regarding discharge  
44 544 from hospital following orthopaedic intervention: A metasynthesis. *Disabil Rehabil*  
45 545 2012; 34: 267–278.
- 46 546 [6] Friedrich M, Cermak T, Maderbacher P. The Effect of Brochure Use Versus Therapist  
47 547 Teaching on Patients Performing Therapeutic Exercise and on Changes in Impairment  
48 548 Status. *Phys Ther* 1996; 76: 1082–1088.

- 1  
2  
3 549 [7] Holden MA, Haywood KL, Potia TA, et al. Recommendations for exercise adherence  
4 550 measures in musculoskeletal settings: a systematic review and consensus meeting  
5 551 (protocol). *Syst Rev* 2014; 3: 10.
- 6 552 [8] Caulfield BM, Donnelly SC. What is connected health and why will it change your  
7 553 practice? *Qjm* 2013; 106: 703–707.
- 8 554 [9] Burns A, Greene BR, McGrath MJ, et al. SHIMMER™ – A Wireless Sensor Platform for  
9 555 Noninvasive Biomedical Research. *IEEE Sens J* 2010; 10: 1527–1534.
- 10 556 [10] Giggins OM, Persson UM, Caulfield B. Biofeedback in rehabilitation. *J Neuroeng*  
11 557 *Rehabil* 2013; 10: 1.
- 12 558 [11] Giggins OM, Sweeney KT, Caulfield B. Rehabilitation exercise assessment using  
13 559 inertial sensors: a cross-sectional analytical study. *J Neuroeng Rehabil* 2014; 11: 158.
- 14 560 [12] O'Reilly MA, Whelan D, Ward T, et al. Technology in Strength and Conditioning:  
15 561 Assessing Bodyweight Squat Technique With Wearable Sensors. *J Strength Cond Res*  
16 562 2017; 31: 2303–2312.
- 17 563 [13] Michie S, Yardley L, West R, et al. Developing and evaluating digital interventions to  
18 564 promote behavior change in health and health care: Recommendations resulting  
19 565 from an international workshop. *J Med Internet Res*; 19(6).
- 20 566 [14] Shah SGSS, Robinson I. Benefits of and barriers to involving users in medical device  
21 567 technology development and evaluation. *Int J Technol Assess Health Care* 2007; 23:  
22 568 131–7.
- 23 569 [15] Bergmann JHM, McGregor AH. Body-Worn Sensor Design : What Do Patients and  
24 570 Clinicians Want ? *Ann Biomed Eng* 2011; 39: 2299–2312.
- 25 571 [16] Papi E, Murtagh GM, McGregor AH. Wearable technologies in osteoarthritis: a  
26 572 qualitative study of clinicians' preferences. *BMJ Open* 2016; 6: e009544.
- 27 573 [17] Ritchie J. *Qualitative research practice: a guide for social science students and*  
28 574 *researchers*. 2nd ed. Sage Publications Sage CA: Los Angeles, CA, 2014.
- 29 575 [18] Bevilacqua A, Huang B, Argent R, et al. Automatic Classification of Knee Rehabilitation  
30 576 Exercises Using a Single Inertial Sensor : a Case Study. In: *2018 IEEE 15th International*  
31 577 *Conference on Wearable and Implantable Body Sensor Networks (BSN)*. IEEE, 2018,  
32 578 pp. 21–24.
- 33 579 [19] Fereday J, Muir-Cochrane E. Demonstrating Rigor Using Thematic Analysis: A Hybrid  
34 580 Approach of Inductive and Deductive Coding and Theme Development. *Int J Qual*  
35 581 *Methods* 2006; 5: 80–92.
- 36 582 [20] Boeije H. A purposeful approach to the constant comparative method in the analysis  
37 583 of qualitative interviews. *Qual Quant* 2002; 36: 391–409.
- 38 584 [21] Goldsmith LJ, Suryaprakash N, Randall E, et al. The importance of informational,  
39 585 clinical and personal support in patient experience with total knee replacement: A  
40 586 qualitative investigation. *BMC Musculoskelet Disord* 2017; 18: 1–13.
- 41 587 [22] Hall AM, Kamper SJ, Hennon M, et al. Measurement Tools for Adherence to Non-  
42 588 Pharmacologic Self-Management Treatment for Chronic Musculoskeletal Conditions :  
43 589 A Systematic Review. *Arch Phys Med Rehabil* 2015; 96: 552–562.
- 44 590 [23] Piwek L, Ellis DA, Andrews S, et al. The Rise of Consumer Health Wearables: Promises  
45 591 and Barriers. *PLoS Med* 2016; 13: e1001953.
- 46 592 [24] Zapata BC, Fernández-Alemán JL, Idri A, et al. Empirical Studies on Usability of  
47 593 mHealth Apps: A Systematic Literature Review. *J Med Syst* 2015; 39: 1–19.
- 48 594 [25] Peake JM, Kerr G, Sullivan JP. A Critical Review of Consumer Wearables, Mobile  
49 595 Applications, and Equipment for Providing Biofeedback, Monitoring Stress, and Sleep

- 1  
2  
3 596 in Physically Active Populations. *Front Physiol* 2018; 9: 743.
- 4 597 [26] Ayoade M, Baillie L. A novel knee rehabilitation system for the home. In: *Proceedings*  
5 598 *of the SIGCHI Conference on human factors in computing systems*. ACM, 2014, pp.  
6 599 2521–2530.
- 7 600 [27] Chen KH, Chen PC, Liu KC, et al. Wearable sensor-based rehabilitation exercise  
8 601 assessment for knee osteoarthritis. *Sensors (Switzerland)* 2015; 15: 4193–4211.
- 9 602 [28] Brutovský J, Novák D. Low-cost motivated rehabilitation system for post-operation  
10 603 exercises. *Annu Int Conf IEEE Eng Med Biol - Proc* 2006; 6663–6666.
- 11 604 [29] Kos A, Tomažič S, Umek A. Suitability of smartphone inertial sensors for real-time  
12 605 biofeedback applications. *Sensors* 2016; 16: 301.
- 13 606 [30] O'Reilly M, Caulfield B, Ward T, et al. Wearable Inertial Sensor Systems for Lower  
14 607 Limb Exercise Detection and Evaluation: A Systematic Review. *Sport Med* 2018; 48:  
15 608 1221–1246.
- 16 609 [31] Jack K, McLean SM, Moffett JK, et al. Barriers to treatment adherence in  
17 610 physiotherapy outpatient clinics: A systematic review. *Man Ther* 2010; 15: 220–228.
- 18 611 [32] Jordan JL, Holden MA, Mason EE, et al. Interventions to improve adherence to  
19 612 exercise for chronic musculoskeletal pain in adults. *Cochrane Database Syst Rev* 2010;  
20 613 1: CD005956.
- 21 614 [33] Peek K, Sanson-Fisher R, Mackenzie L, et al. Interventions to aid patient adherence to  
22 615 physiotherapist prescribed self-management strategies: a systematic review.  
23 616 *Physiotherapy* 2016; 102: 127–135.
- 24  
25  
26  
27  
28  
29  
30  
31  
32  
33  
34  
35  
36  
37  
38  
39  
40  
41  
42  
43  
44  
45  
46  
47  
48  
49  
50  
51  
52  
53  
54  
55  
56  
57  
58  
59  
60



1  
2  
3  
4  
5  
6  
7  
8  
9  
10  
11  
12  
13  
14  
15  
16  
17  
18  
19  
20  
21  
22  
23  
24  
25  
26  
27  
28  
29  
30  
31  
32  
33  
34  
35  
36  
37  
38  
39  
40  
41  
42  
43  
44  
45  
46  
47  
48  
49  
50  
51  
52  
53  
54  
55  
56  
57  
58  
59  
60

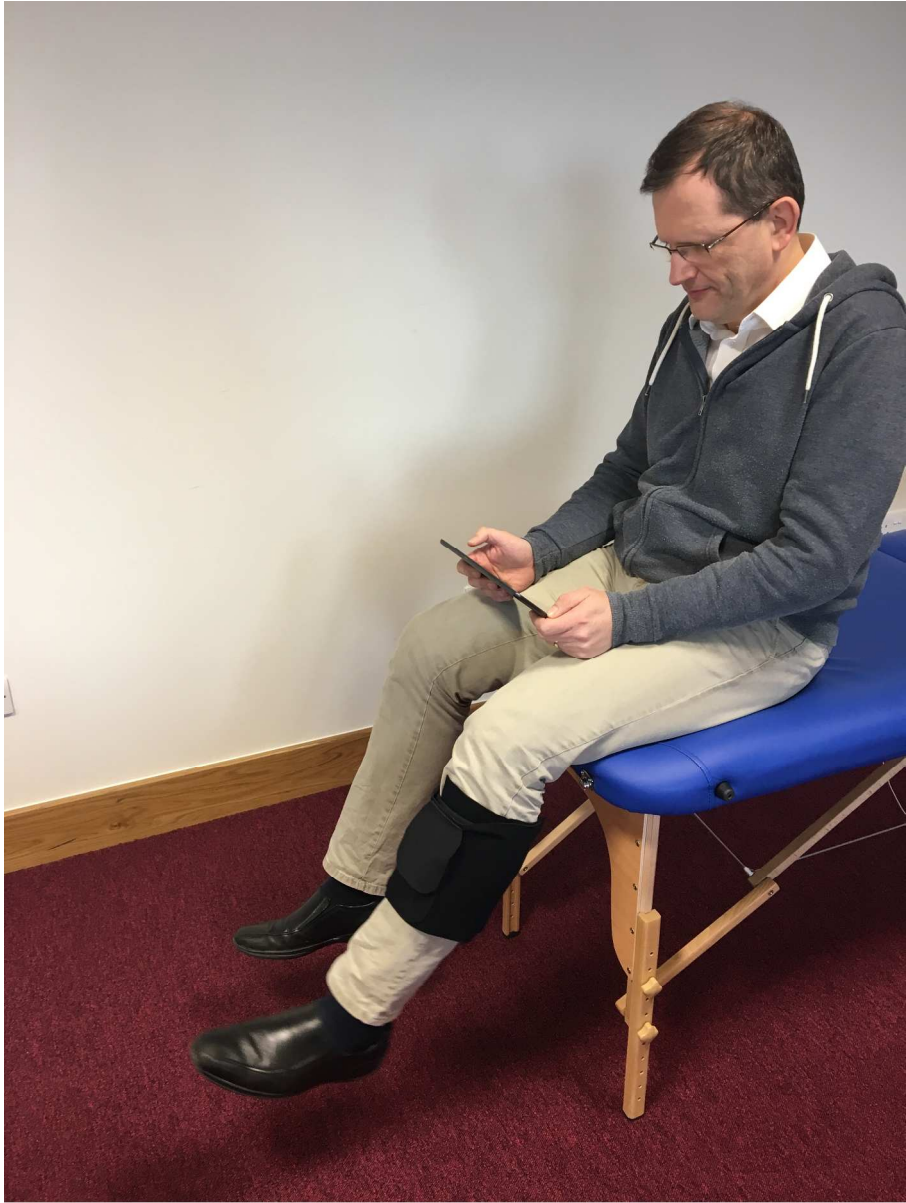

Figure 1: User setup of biofeedback system with single IMU placed on the shin and associated tablet application (written consent provided for use of image).

1066x1422mm (72 x 72 DPI)

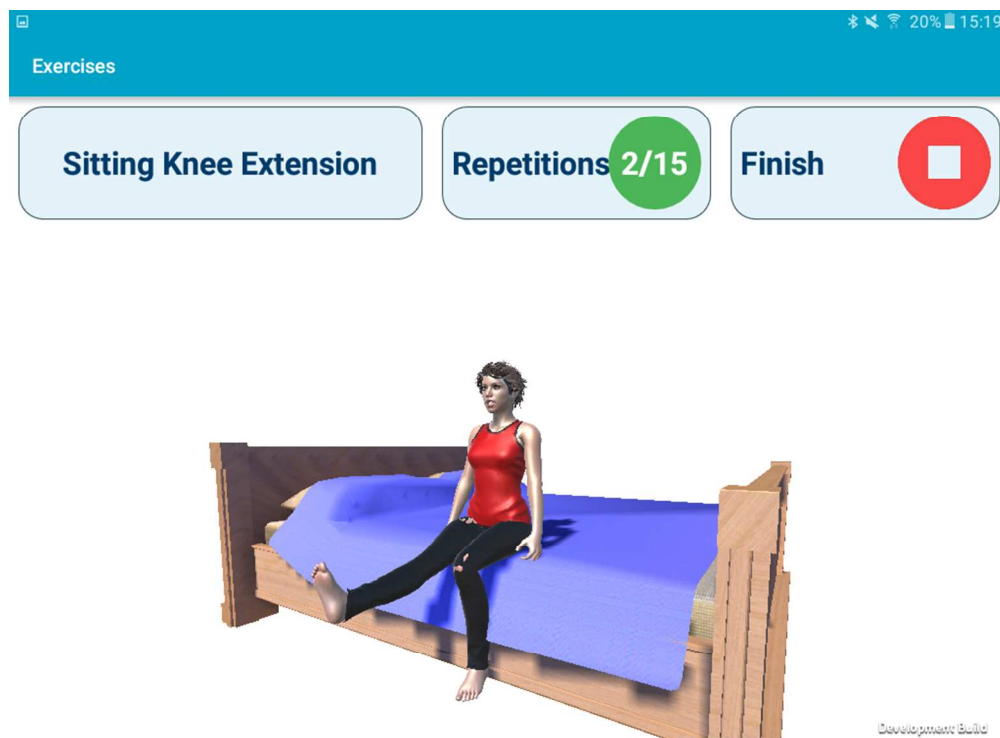

Figure 2: Screenshot of Android application during exercise mode.

361x270mm (72 x 72 DPI)

## INTERVIEW TOPIC GUIDE:

*Current Practice*

- What methods would you currently use for monitoring and feedback during patient rehabilitation?

*Wearables*

- Do you know anything about wearable technology?
  - o If so tell me what you know, how they're used and your view of them.

*Opportunities & Challenges for Connected Health in Orthopaedic Rehabilitation*

- What do you think are the opportunities of using technology in orthopaedic rehabilitation?
  - o Equally what do you think are the challenges?
- What do you think of the role of mobile phones and tablets in monitoring of patients.

*Perceived Impact*

- Having used this technology, what do you think about using software like this for this purpose?
- How did you find using this particular application?
- What impact do you think this could have for patient rehabilitation?
  - o Both for the patient, and for clinicians.
  - o How would you perceive a system like this changing clinical practice?
- Is there any way we can improve on this application from your experience?
- What did you think about the way the information was presented in the app?
- Did you encounter any difficulties whilst using the software, any tasks that you found difficult or technical issues?

| Theme            | Sub Theme(s)  | Quote                                                                                                                                                                                                                                                                                                                                                                                                  | Participant               |
|------------------|---------------|--------------------------------------------------------------------------------------------------------------------------------------------------------------------------------------------------------------------------------------------------------------------------------------------------------------------------------------------------------------------------------------------------------|---------------------------|
| Current Practice | Measures Used | <i>Generally, I would manually take objective measures, traditional measures like muscle strength, range of motion, and then some subjective ones as well, opinion based on movement quality.</i>                                                                                                                                                                                                      | Physiotherapist           |
|                  |               | <i>We use the goniometer to measure how much flexibility has come into their hip or knee. That's the only indication we can give them by using something as a tool. Otherwise we eyeball and give a rough estimate.</i>                                                                                                                                                                                | Orthopaedic Assistant     |
|                  |               | <i>To give an example, the lady that I saw yesterday she was 3 weeks and 6 days after her knee replacement and had 130 degree knee bend. Whereas I know from doing this job and from seeing a lady earlier on in the week and only has 70 degree knee bend. You can see with the lady who has 130 knee bend she doesn't realise how well she is doing, but she thinks she should be further along.</i> | Clinical Nurse Specialist |
|                  |               | <i>Measuring the range with a goniometer but there's a lot of intra reliability issues with it you know, as to whether you're specifically getting the right measure from one to the next so I wouldn't say how valid it is.</i>                                                                                                                                                                       | Physiotherapist           |
|                  |               | <i>Say for a knee replacement they have their CPMs so once they start to reach towards their 90 degrees.</i>                                                                                                                                                                                                                                                                                           | Staff Nurse               |
|                  |               | <i>I would start out with the swelling, if there's any swelling present around the knee or the hip.</i>                                                                                                                                                                                                                                                                                                | Orthopaedic Assistant     |
|                  |               | <i>Any lag with some of their movements they were doing, I would tell them you were lagging yesterday but today you're much better than what you were yesterday.</i>                                                                                                                                                                                                                                   | Orthopaedic Assistant     |
|                  |               | <i>We would look for breaking down different parts of their gait, the distance they've walked, the time they would take to do the distance which would give the speed as well, the stepping pattern, the step length.</i>                                                                                                                                                                              | Physiotherapist           |
|                  |               | <i>Some patients would use the tick box in the booklet, like a diary, a list of the exercises and dates and times that they can tick it off.</i>                                                                                                                                                                                                                                                       | Physiotherapist           |
|                  |               | <i>Using scales like pain scales and functionality scales.</i>                                                                                                                                                                                                                                                                                                                                         | Physiotherapist           |
|                  |               | <i>Decreasing pain reports, or decreasing reports about their pain experience, and decreasing levels of analgesia would be the two outcome measures.</i>                                                                                                                                                                                                                                               | Clinical Nurse Specialist |

1  
2  
3  
4  
5  
6  
7  
8  
9  
10  
11  
12  
13  
14  
15  
16  
17  
18  
19  
20  
21  
22  
23  
24  
25  
26  
27  
28  
29  
30  
31  
32  
33  
34  
35  
36  
37  
38  
39  
40  
41  
42  
43  
44  
45  
46  
47

|  |                       |                                                                                                                                                                                                                                                                                                                                                                                                        |                        |
|--|-----------------------|--------------------------------------------------------------------------------------------------------------------------------------------------------------------------------------------------------------------------------------------------------------------------------------------------------------------------------------------------------------------------------------------------------|------------------------|
|  |                       | <i>Their pain is another thing we would use as a measure as well to I guess progress, you know often the reason people have had an ortho procedure is because of pain so that's an important thing for the patient to show that they're improving and that's something we would definitely take as an objective measure.</i>                                                                           | Physiotherapist        |
|  |                       | <i>We're probably not as, like with physio they're looking at ROM and they're commenting specifically on joint range, we're more looking at it from a functional perspective, are they able to you know perform a task in a safe manner whilst adhering to the guidelines that are set out past their surgery.</i>                                                                                     | Occupational Therapist |
|  |                       | <i>Returning to function is another important measure, we would check pre-during and post-op, especially pre and post from a function point of view. Are they back doing ADLs, Sport, working. So those type of things we would check. Sometimes it's just asking through subjective questions or others would be questionnaires such as the WOMAC to find out functionally how that is improving.</i> | Physiotherapist        |
|  |                       | <i>How many can you achieve before you fatigue / movement quality is poor. That's gold.</i>                                                                                                                                                                                                                                                                                                            | Physiotherapist        |
|  |                       | <i>...but it would be nice to have an objective measure of movement quality to feedback to the patients.</i>                                                                                                                                                                                                                                                                                           | Physiotherapist        |
|  | Lacking Objectivity   | <i>Objective markers are few and far between and we're still reliant on the old clinical measures like range of motion, muscle strength - which if you're testing on an Oxford scale it's a very subjective thing.</i>                                                                                                                                                                                 | Physiotherapist        |
|  | Lacking Objectivity   | <i>I suppose it's a lot of observation and it is quite subjective in a lot of other ways like stair mobility.</i>                                                                                                                                                                                                                                                                                      | Occupational Therapist |
|  | Lacking Objectivity   | <i>Objectively again you'd ask their pain scales, I'll ask them to keep an exercise diary, what duration they would walk, how many times they exercises a day, and again keep a record of it, as if they don't it's just a subjective response.</i>                                                                                                                                                    | Physiotherapist        |
|  | Lacking Objectivity   | <i>Monitoring them you're really just looking at visually just using your visual aids yourself so gauging yourself their progression.</i>                                                                                                                                                                                                                                                              | Physiotherapist        |
|  | Lacking Objectivity   | <i>But it is more, kind of, you don't have anything to, how do I say it, you don't have machines. So it is really a more kind of ongoing assessment.</i>                                                                                                                                                                                                                                               | Staff Nurse            |
|  | Feedback & Monitoring | <i>I guess just verbal feedback is our only option... but when they go home we're not giving them any feedback 'til they come back to the clinic.</i>                                                                                                                                                                                                                                                  | Physiotherapist        |

|           |                         |                                                                                                                                                                                                                                                                              |                           |
|-----------|-------------------------|------------------------------------------------------------------------------------------------------------------------------------------------------------------------------------------------------------------------------------------------------------------------------|---------------------------|
|           |                         | <i>Verbal feedback or sometimes written feedback so you're adapting things to their ability... most of the patients in the early post-op phase need it to be clearly documented in front of them to make a change otherwise they forget.</i>                                 | Physiotherapist           |
|           |                         | <i>Purely conversation.</i>                                                                                                                                                                                                                                                  | Clinical Nurse Specialist |
|           |                         | <i>Some patients themselves have said when they contacted me that they don't know what stage they should be at, even though we provide them with the info at pre assessment beforehand, even though we go through the information when they're here in the hospital.</i>     | Clinical Nurse Specialist |
|           |                         | <i>They can call in if they have a problem but between the visits of the teams that are going out once a day over the course of the first week, no they have to get on with it themselves, they don't have anything to work off except what they've been educated to do.</i> | Physiotherapist           |
|           |                         | <i>You're not watching them and they're like oh yeah I did my exercises and you just have to go by that they did it.</i>                                                                                                                                                     | Staff Nurse               |
| Wearables | Current Use & Awareness | <i>A mobile phone that measures your distance, and measures calories and distance walked and you can go back and check and see exactly what you've done for a day.</i>                                                                                                       | Orthopaedic Assistant     |
|           |                         | <i>I've used a pedometer here at work when they were trying to get people to take more steps, I have used a HR monitor when training.</i>                                                                                                                                    | Physiotherapist           |
|           |                         | <i>Yes, erm map my run... . I have another mobility app and its more for tracking distance.</i>                                                                                                                                                                              | Occupational Therapist    |
|           |                         | <i>I've used the sensors, the HR monitor sensors and things like that for GAA training in the past and that was more to do specific testing.</i>                                                                                                                             | Physiotherapist           |
|           |                         | <i>I've used the watch technology for some swim training and some gym training when I was training for specific things.</i>                                                                                                                                                  | Physiotherapist           |
|           |                         | <i>I actually haven't used any wearable technology so there's not much I can tell you to be honest.</i>                                                                                                                                                                      | Orthopaedic Assistant     |
|           |                         | <i>I haven't used any... I know you can get all sorts of apps that'll measure all sorts of objective measurements of sports performance.</i>                                                                                                                                 | Physiotherapist           |
|           |                         | <i>A lot of my patients at the moment all have fitbits for measurements of how many steps do they take per day, a lot of the smartphones obviously have apps as well that record how many calories and steps they're taking, what distance they walked, run, cycle.</i>      | Physiotherapist           |

|  |              |                                                                                                                                                                                                                                                                                                                                                        |                           |
|--|--------------|--------------------------------------------------------------------------------------------------------------------------------------------------------------------------------------------------------------------------------------------------------------------------------------------------------------------------------------------------------|---------------------------|
|  | Motivational | <i>It gives you a sense of achievement. At the end of each session say I've gone for a nice long walk and I've made sure it is uphill/downhill all that stuff you know. If I look at it and say well I've walked 10km I think I'm quite happy with that for a day, you're delighted with yourself so you do get a sense of accomplishment from it.</i> | Orthopaedic Assistant     |
|  |              | <i>The 10k steps definitely does encourage people to be more active, they're more conscious, they're more objective.</i>                                                                                                                                                                                                                               | Physiotherapist           |
|  |              | <i>I just think for the whole kinda like tracking your steps, my friend was showing me hers and it tells you what you've done and what you have to do and you can compete with other people. I think they're quite motivating.</i>                                                                                                                     | Staff Nurse               |
|  |              | <i>I like it from a motivational point of view and you have an excel spreadsheet and you can compare averages like this time to a year ago.</i>                                                                                                                                                                                                        | Physiotherapist           |
|  |              | <i>And you kind of got little rewards or prompts from it you know, congratulations you've done 5 days in a row and I liked that.</i>                                                                                                                                                                                                                   | Occupational Therapist    |
|  | Track Data   | <i>Well I suppose I would predominantly have used it for measuring distance, so if I was tracking myself or setting myself a goal for exercise in terms of time and distance, erm, it would have been, it's a useful thing for a tracker.</i>                                                                                                          | Occupational Therapist    |
|  |              | <i>You give a patient an exercise and the subjective they may report one thing but at least with the objective measurements you have something in front of you that they walked 5k in a certain time or they did do a certain amount of steps.</i>                                                                                                     | Physiotherapist           |
|  |              | <i>I think they can be used to encourage people to give feedback, they can see their improvements and if people are into tech they can actually track their different training programmes and log, you can see how you're improving and just from peoples feedback to me some people really like that.</i>                                             | Orthopaedic Assistant     |
|  |              | <i>I did look at the data but I probably haven't uploaded the data anywhere or done anything more with it than literally monitor anything.</i>                                                                                                                                                                                                         | Clinical Nurse Specialist |
|  | Negatives    | <i>How can it differentiate between height and weight and I don't know if that is always taken into account with some of these technologies.</i>                                                                                                                                                                                                       | Clinical Nurse Specialist |
|  |              | <i>I know there are newer and updated versions of fitbits and other wearables coming out that have HR and calories burnt but again how specific is that to the patient compared to a generalised population.</i>                                                                                                                                       | Physiotherapist           |

|                                  |             |                                                                                                                                                                                                                                                                                                                                                                                            |                           |
|----------------------------------|-------------|--------------------------------------------------------------------------------------------------------------------------------------------------------------------------------------------------------------------------------------------------------------------------------------------------------------------------------------------------------------------------------------------|---------------------------|
|                                  |             | <i>My opinion is I personally would find it irritating. Why? I hate email reminders, and uninvited contact from companies. For me a fitbit is impractical as we have a bare wrist policy so most of my life it has no relevance to me. But the main block would be uninvited contact.</i>                                                                                                  | Clinical Nurse Specialist |
|                                  |             | <i>It's the remote setting of goals, or the setting of goals that you then fail. So your sense of failure overrides your sense of success. I think there's a possibility of the two things happening and I think for me would detract from the benefit of wearing it. If I felt I wasn't meeting goals.</i>                                                                                | Clinical Nurse Specialist |
|                                  |             | <i>There is nearly an obsession that they have to achieve 10k steps when I have seen security guards just marching on the spot rather than just walking.</i>                                                                                                                                                                                                                               | Physiotherapist           |
|                                  |             | <i>I think you can get sick of having that many options available to you. And I think that there's so much choice out there and you never know what one is going to work for you until you have downloaded a few and seen what works best for you and your lifestyle and what you want to use it for.</i>                                                                                  | Staff Nurse               |
|                                  |             | <i>I don't particularly like being on technology overly so I don't necessarily want to have to go after my run onto my laptop to track my run. I've been involved in sport at a high level for a long time so I have a good understanding myself of how to push myself so I don't need that feedback but I can see how it is really good for people who wouldn't have that background.</i> | Physiotherapist           |
| Connected Health in Orthopaedics | Opportunity | <i>I think there's definitely a place for it because it's much more in peoples life than ever. Lots of people like apps now and they like to tag into something and if it can give more specific individual feedback then there's definitely a role for it to be a part of their progression, especially resulting in something that will rehab for months.</i>                            | Physiotherapist           |
|                                  |             | <i>I suppose if they had an app and stuff on them, do you know they could like, everyone kinda YouTube's stuff and they're not accurate. Everyone's saying oh well that looks like that's what I'm doing but you don't really know. But if you did have the fitbit you could say right well I actually have done it and you just feel a bit more secure I suppose.</i>                     | Staff Nurse               |
|                                  |             | <i>A lot of GP surgeries are using remote technology with their patients, even medical records are being shared with patients that they then take into their hospital. I mean there's huge growth in that.</i>                                                                                                                                                                             | Clinical Nurse Specialist |



|  |          |                                                                                                                                                                                                                                                                                                                                                                                                                                              |                           |
|--|----------|----------------------------------------------------------------------------------------------------------------------------------------------------------------------------------------------------------------------------------------------------------------------------------------------------------------------------------------------------------------------------------------------------------------------------------------------|---------------------------|
|  |          | <i>Erm I think I've seen a lot of people and proposals in relation to an introduction of kind of these wearables into the health and not just the fitness sector and to do with health and health monitoring so I think there is definitely a huge role to play.</i>                                                                                                                                                                         | Occupational Therapist    |
|  |          | <i>Well I suppose orthopaedic rehab because it's so prescriptive and it's so specific, and I know it had to be personalised and individualised but the exercises are pretty much the exercises you're going to do after a knee surgery or hip surgery so I mean in a way I think its I suppose there aren't as many variables with it.</i>                                                                                                   | Physiotherapist           |
|  |          | <i>I'm a bit of a control freak and I would love if I was a patient if I could have something that easily helped me track my health in terms of my BP, glucose levels, HR, O2 levels. So it took a more holistic view, something that I could track.</i>                                                                                                                                                                                     | Occupational Therapist    |
|  |          | <i>The last job I had in spinal wards where if there was something there, if there's people there and they could see progress on a screen rather than just being told, you're doing great, you're doing fantastic. I'm sure that grinds on people a bit you know. Definitely in the orthopaedic ward, if there's a way of saying this is where you were at the start, now you're here, now you're here I'm sure that would be brilliant.</i> | Orthopaedic Assistant     |
|  |          | <i>I think it's the future of physiotherapy probably, what we tried to introduce was emailing, there's always going to be some issues with emailing. Not just pictures and descriptions but videos of how an exercise should be performed.</i>                                                                                                                                                                                               | Physiotherapist           |
|  | Features | <i>You can always video call them and see how are you getting on, that way you don't have to physically go to the house to see how they're getting on. They can just show you the exercise.</i>                                                                                                                                                                                                                                              | Orthopaedic Assistant     |
|  |          | <i>Unless you had the smartphone or something you can communicate with the patient through that, obviously for example you have facetime</i>                                                                                                                                                                                                                                                                                                 | Staff Nurse               |
|  |          | <i>Even something like a fitbit that showed a graph that you can go and check if they've actually done their exercise/if they've achieved their targets. It's very easy to say oh yeah you look like you're doing it right until you kinda see.</i>                                                                                                                                                                                          | Staff Nurse               |
|  |          | <i>I think it would give the patient an opportunity to give a much more personal record of their experience. And, you know, also a central monitoring or central axis, I mean if you had a patient tablet in a room and a nurse had a smartphone or something in her pocket.</i>                                                                                                                                                             | Clinical Nurse Specialist |

|  |            |                                                                                                                                                                                                                                                                                                                                                                                                                                                                                                                                |                           |
|--|------------|--------------------------------------------------------------------------------------------------------------------------------------------------------------------------------------------------------------------------------------------------------------------------------------------------------------------------------------------------------------------------------------------------------------------------------------------------------------------------------------------------------------------------------|---------------------------|
|  |            | <i>That she could check into, and say ok patient in 302 is reporting pain in the last hour, I haven't been in there ill check. Very simple things whereas patients don't always tell you?</i>                                                                                                                                                                                                                                                                                                                                  |                           |
|  |            | <i>Even from an older persons discharging to home perspective from family to be able to see how their health is doing its not this subjective, oh mum started feeling unwell, I think it was 3 or 4 days ago but if something even, just temperatures, something very basic and something very objective that you could measure over time that'd be really helpful.</i>                                                                                                                                                        | Occupational Therapist    |
|  |            | <i>How much bend they have on their knee without being strapped to the machine (CPM). Maybe that'd be something in the future that could be even better again, something along those lines.</i>                                                                                                                                                                                                                                                                                                                                | Orthopaedic Assistant     |
|  |            | <i>I love the idea of real-time feedback, the idea something can tell you you're doing something wrong immediately and help you correct it. I think some patients having that insight and that awareness and that something to prompt you on the spot because that's what we would sometimes find is that people would get into behaviours or habits of doing things. I'm trying to think about the transition from hospital to home, a lot of the time they go home and it's as if we're starting from scratch with them.</i> | Occupational Therapist    |
|  |            | <i>When they come to pre-ops rather than handing them loads of sheets that they're given that information via email or an app so once they come in they download the app and get all that information and say refer them to that during it.</i>                                                                                                                                                                                                                                                                                | Clinical Nurse Specialist |
|  | Challenges | <i>Getting the patient to buy in to it is the number one challenge, from everything. A piece of tech that I've used with athletes would be monitoring of their load fitting in their activity duration during their training session to build up their profile of how much training they've done – getting them to use it is a problem but when they do use it its invaluable.</i>                                                                                                                                             | Physiotherapist           |
|  |            | <i>I think there are an awful lot of opportunities there but a lot of it comes down to patient compliance.</i>                                                                                                                                                                                                                                                                                                                                                                                                                 | Clinical Nurse Specialist |
|  |            | <i>The more work they have to do the less reliable it is.</i>                                                                                                                                                                                                                                                                                                                                                                                                                                                                  | Physiotherapist           |
|  |            | <i>If you expect the patient to go back and log onto a computer to record data you're not going to get it.</i>                                                                                                                                                                                                                                                                                                                                                                                                                 | Physiotherapist           |
|  |            | <i>Time... in an outpatient session you've got 30 mins to get them in, assessed, treated, progressed, and then how relative is it going to be taking up your time to look up their adherence levels etc. because if they come in and you see that they've improved and their</i>                                                                                                                                                                                                                                               | Physiotherapist           |

|    |  |                                                                                                        |                 |
|----|--|--------------------------------------------------------------------------------------------------------|-----------------|
| 1  |  |                                                                                                        |                 |
| 2  |  |                                                                                                        |                 |
| 3  |  |                                                                                                        |                 |
| 4  |  |                                                                                                        |                 |
| 5  |  | <i>quality of movement has improved you can be fairly confident they've been adherent to</i>           |                 |
| 6  |  | <i>their exercises.</i>                                                                                |                 |
| 7  |  | <i>If you don't have a good understanding of the app or the technology itself, it can be quite</i>     | Orthopaedic     |
| 8  |  | <i>difficult for someone to use it. For example, if it is someone quite elderly, they wouldn't be</i>  | Assistant       |
| 9  |  | <i>as tech savvy as someone in their teens or early twenties. So it's the whole aspect of</i>          |                 |
| 10 |  | <i>getting to know about the app or technology before they start using it. That would be the</i>       |                 |
| 11 |  | <i>only difficulty there.</i>                                                                          |                 |
| 12 |  | <i>I suppose how user friendly the app and I suppose that can be a weakness and a strength</i>         | Clinical Nurse  |
| 13 |  | <i>for patients, depending on the patient age population.</i>                                          | Specialist      |
| 14 |  | <i>And the big problem is if they cannot use it then it is pointless</i>                               | Physiotherapist |
| 15 |  | <i>I mean if the interface is difficult or if something, errors keep occurring, I think the more</i>   | Occupational    |
| 16 |  | <i>simple a thing is and the more intuitive it is the easier it will be from an uptake and an</i>      | Therapist       |
| 17 |  | <i>ongoing compliance issue.</i>                                                                       |                 |
| 18 |  | <i>The technology actually working, how many times you know, the lack of WIFI, computer</i>            | Clinical Nurse  |
| 19 |  | <i>crashing. I suppose they would be the huge elements.</i>                                            | Specialist      |
| 20 |  | <i>The ability to pick up on the false in particular because obviously there's going to be a limit</i> | Physiotherapist |
| 21 |  | <i>to what the technology can do so it needs to be factored towards a specific goal so</i>             |                 |
| 22 |  | <i>whatever that is.</i>                                                                               |                 |
| 23 |  | <i>If you look at the elderly population that are primarily getting joint replacements are a lot</i>   | Physiotherapist |
| 24 |  | <i>of them au fait with, some of them would be but there would be presumably a large</i>               |                 |
| 25 |  | <i>percentage who aren't au fait with iPad, iPhone and similar technologies.</i>                       |                 |
| 26 |  | <i>I suppose, a lot of people have the technology, that's not as much a barrier. It's so</i>           | Occupational    |
| 27 |  | <i>accessible now on smartphones and so many people have smartphones I don't really see</i>            | Therapist       |
| 28 |  | <i>that as a barrier. Nor do I see the whole age profile of the patients as a barrier because I'm</i>  |                 |
| 29 |  | <i>seeing 90 year olds using skype and Facebook and I think that barrier is reducing.</i>              |                 |
| 30 |  | <i>Yes of course, without being rude and I would put myself in the same bracket, not being</i>         | Orthopaedic     |
| 31 |  | <i>ageist. But certain people of an age are fantastic with technology, you know I know we</i>          | Assistant       |
| 32 |  | <i>have the silver surfers and that's what they're being christened, but I see a lot in the</i>        |                 |
| 33 |  | <i>hospital where they're skyping families – telling them they're feeling well.</i>                    |                 |
| 34 |  |                                                                                                        |                 |
| 35 |  |                                                                                                        |                 |
| 36 |  |                                                                                                        |                 |
| 37 |  |                                                                                                        |                 |
| 38 |  |                                                                                                        |                 |
| 39 |  |                                                                                                        |                 |
| 40 |  |                                                                                                        |                 |
| 41 |  |                                                                                                        |                 |
| 42 |  |                                                                                                        |                 |
| 43 |  |                                                                                                        |                 |
| 44 |  |                                                                                                        |                 |
| 45 |  |                                                                                                        |                 |
| 46 |  |                                                                                                        |                 |
| 47 |  |                                                                                                        |                 |

|                              |            |                                                                                                                                                                                                                                                                                                                                                                                                                                                                                                                                                                                                                                 |                           |
|------------------------------|------------|---------------------------------------------------------------------------------------------------------------------------------------------------------------------------------------------------------------------------------------------------------------------------------------------------------------------------------------------------------------------------------------------------------------------------------------------------------------------------------------------------------------------------------------------------------------------------------------------------------------------------------|---------------------------|
|                              |            | <i>I think the barriers to technology in health are coming down every day. I see such changes for the older population on the ward now.</i>                                                                                                                                                                                                                                                                                                                                                                                                                                                                                     | Occupational Therapist    |
|                              |            | <i>One would have said data protection, that's always going to be your main challenge.</i>                                                                                                                                                                                                                                                                                                                                                                                                                                                                                                                                      | Clinical Nurse Specialist |
|                              |            | <i>So I suppose how can the app be, you know, I know this seems like a strange one, but how many times have we heard of people being hacked, and the technology being there and being stolen and stuff like that and I think unfortunately that's getting more and more common. I don't know if that's something anybody will think of when it comes to this kind of app for healthcare for better patients. But I do think that's something the potential is there for.</i>                                                                                                                                                    | Clinical Nurse Specialist |
|                              |            | <i>So I would think that with technology the person that has to be driving the connection is the patient.</i>                                                                                                                                                                                                                                                                                                                                                                                                                                                                                                                   | Clinical Nurse Specialist |
|                              |            | <i>So you need to overcome that barrier with the patient that they might perceive it as something that you are handing over responsibility when in fact what you're trying to do is get a better understanding to deepen a relationship. You want to use it in a way that enhances the trusting element of the patient-HCP relationship. That has to be the fundamental process. You have to utilise it in a way that actually increases that relationship as opposed to detracts from it.</i>                                                                                                                                  | Clinical Nurse Specialist |
|                              |            | <i>Just that it can't replace actually somebody being there looking at them. Even though you can have two people looking at someone doing an exercise a highly trained physio is going to see what needs to be tweaked in your technique with something. It's very easy to do an exercise that actually is going to ramp up your pain and you can just change it slightly and often you're not, and I don't think tech can replace that part of it but if it's going to be used to iron out the simpler things, but the higher things you need an experienced eye to see I don't necessarily know how you can replace that.</i> | Physiotherapist           |
| Perceived Impact of Exemplar | Track Data | <i>Then at least you can track as well to see if they're actually using it at all. Because if they're not using it then they're likely not doing anything.</i>                                                                                                                                                                                                                                                                                                                                                                                                                                                                  | Physiotherapist           |
|                              |            | <i>One of my favourite things about it is that you can score the difficulty, if somebody is scoring 555 then they're finding it too difficult but if they're scoring 111 you can progress them on very quickly.</i>                                                                                                                                                                                                                                                                                                                                                                                                             | Physiotherapist           |

|  |                      |                                                                                                                                                                                                                                                                                                             |                           |
|--|----------------------|-------------------------------------------------------------------------------------------------------------------------------------------------------------------------------------------------------------------------------------------------------------------------------------------------------------|---------------------------|
|  |                      | <i>I like the mood as well in terms of from a depression point of view, they're so much depression out there, these people may act knowledge it and this could pick up a few mental health issues as well.</i>                                                                                              | Physiotherapist           |
|  |                      | <i>It gathers up data and tells you whether the patients are doing the exercises or not. That way if they say they have done it you can say no, you didn't do the exercise I've got the information here so yes its quite good to go back to.</i>                                                           | Staff Nurse               |
|  |                      | <i>The data is automatically taken and you're not physically putting the data into a computer, all you're doing is log into the app and just go onto the page you want to see and put it all together. Instead of spending hours on a computer putting the data in so yeah it'll be a big hit for sure.</i> | Orthopaedic Assistant     |
|  |                      | <i>It would change maybe the clinical practice, because if you were noticing a certain surgeons patients experienced more pain, or people discharged over the weekend have higher pain levels, you know then what you're doing is establishing patterns that allow you to intervene.</i>                    | Clinical Nurse Specialist |
|  |                      | <i>You're always going to see what you see, but this is something where you can record data and it doesn't lie.</i>                                                                                                                                                                                         | Orthopaedic Assistant     |
|  |                      | <i>I'm very impressed by the spreadsheet at the end that tells you if you've done it correctly or incorrectly, I'm impressed by the graphs and saying the amount of reps performed and if you've done your dosage for the day or over a period.</i>                                                         | Physiotherapist           |
|  | Improve Outcome      | <i>Very useful, I think it'll improve the quality of the patients exercise.</i>                                                                                                                                                                                                                             | Physiotherapist           |
|  |                      | <i>It'll improve the quality of the patients rehab. So I think they will be more likely to follow more structured programmes when they have visual feedback to do it.</i>                                                                                                                                   | Physiotherapist           |
|  |                      | <i>There are times when you could be doing the exercise but you wouldn't know if you were doing it right or wrong so to be told that you are doing the exercises incorrectly it makes you go back and do them properly again that way you know you're getting the best out of it.</i>                       | Orthopaedic Assistant     |
|  |                      | <i>I think they'd rehab quicker and be more confident in their rehab, which is the best thing.</i>                                                                                                                                                                                                          | Staff Nurse               |
|  |                      | <i>I think you're going to do the same thing, but at a better standard and a better quality.</i>                                                                                                                                                                                                            | Physiotherapist           |
|  | Motivation & Support | <i>I think it will enhance the patient confidence in their recovery... it's reassuring to know you're on track.</i>                                                                                                                                                                                         | Clinical Nurse Specialist |

|  |                       |                                                                                                                                                                                                                                                                                                                                                                                                                               |                           |
|--|-----------------------|-------------------------------------------------------------------------------------------------------------------------------------------------------------------------------------------------------------------------------------------------------------------------------------------------------------------------------------------------------------------------------------------------------------------------------|---------------------------|
|  |                       | <i>There are times when you could be doing the exercise but you wouldn't know if you were doing it right or wrong so to be told that you are doing the exercises incorrectly it makes you go back and do them properly again that way you know you're getting the best out of it.</i>                                                                                                                                         | Orthopaedic Assistant     |
|  |                       | <i>The feedback from the screen, makes you think how am I going to complete these exercises correctly you know.</i>                                                                                                                                                                                                                                                                                                           | Clinical Nurse Specialist |
|  |                       | <i>From their perspective they're getting feedback immediately that they're doing something wrong and there's a prompt to give them the idea of maybe what they're doing and how they could perform the exercise better which is great.</i>                                                                                                                                                                                   | Occupational Therapist    |
|  |                       | <i>Yeah well its correcting you and telling you that you're not doing it properly or that you're doing it perfectly and its nice for people to feel like they have sort of backup when they go home.</i>                                                                                                                                                                                                                      | Staff Nurse               |
|  |                       | <i>I think it will be a fantastic impact on the patient it really would. I can't overemphasise the amount of times that people, when they see themselves progressing they go much further again and it shoots along. They really get a sense of wellbeing, accomplishment all that sort of stuff and they know I'm getting there, I can see I'm getting there. I can visibly see and I can see the data as well you know.</i> | Orthopaedic Assistant     |
|  | Healthcare Efficiency | <i>... you're hopefully not going to need MUA's (Manipulation under anaesthetic) and that kind of thing because you're doing it right from the beginning.</i>                                                                                                                                                                                                                                                                 | Staff Nurse               |
|  |                       | <i>As a patient, I would imagine that if I was doing my exercises correctly, I would need less appointment time with a physiotherapist... If I wasn't doing the exercises correctly, the physiotherapist might call me to go through how to do it, but if I'm doing my exercises correctly, if I'm reaching the goals I need to and the activity levels that I need to, why do I need to come in and see a physio?</i>        | Clinical Nurse Specialist |
|  |                       | <i>It would even reduce the phone calls in saying I don't know if I'm doing this right or I think I'm doing something wrong because it's there in front of you.</i>                                                                                                                                                                                                                                                           | Staff Nurse               |
|  |                       | <i>As a patient I would imagine that if I was doing my exercises correctly, I would need less appointment time with a physiotherapist. Particularly if I'm paying for it.</i>                                                                                                                                                                                                                                                 | Clinical Nurse Specialist |
|  |                       | <i>It would save them from travelling out of the house, a lot of patients would struggle to get a lift to the hospital and trying to manage around people's workloads to get lifts.</i>                                                                                                                                                                                                                                       | Orthopaedic Assistant     |

|    |                                                                                                                      |                                                                                                                                                                                                                                                                                                                                                                  |                           |
|----|----------------------------------------------------------------------------------------------------------------------|------------------------------------------------------------------------------------------------------------------------------------------------------------------------------------------------------------------------------------------------------------------------------------------------------------------------------------------------------------------|---------------------------|
| 1  | Challenges                                                                                                           | <i>As long as I follow it... I wouldn't go and see the physio again.</i>                                                                                                                                                                                                                                                                                         | Orthopaedic Assistant     |
| 2  |                                                                                                                      | <i>It's not going to take the place of the therapist you know, but it just serves to really hammer home the message you're trying to get across to the patient.</i>                                                                                                                                                                                              | Physiotherapist           |
| 3  |                                                                                                                      | <i>The worry that it won't be giving you the right information and then it's going to skew your thought process and that of others because you can only report on what you're being given.</i>                                                                                                                                                                   | Physiotherapist           |
| 4  |                                                                                                                      | <i>Well overall I suppose if you thought you were doing great and then this pops up you'd kind of get a bit of an oh I've been doing it wrong and you might be put off and you might be like I'm not using that again, but I think that'd be very dramatic.</i>                                                                                                  | Staff Nurse               |
| 5  |                                                                                                                      | <i>The worry that it won't be giving you the right information and then it's going to skew your thought process and that of others because you can only report on what you're being given.</i>                                                                                                                                                                   | Physiotherapist           |
| 6  |                                                                                                                      | <i>There was some issues when I was using it that it wasn't picking up all my reps correctly. So that is an issue. If I was using that at home it would frustrate me if I had done 15 and it said I had done 10.</i>                                                                                                                                             | Physiotherapist           |
| 7  |                                                                                                                      | <i>It's quite sensitive in that regard but it's better to have it too sensitive than not. The only thing is if it constantly tells the patient the exercise is wrong are they going to say I can't do that exercise right anyway so I'm not doing it and skipping it.</i>                                                                                        | Physiotherapist           |
| 8  |                                                                                                                      | <i>How it is at the moment it's not picking up the exercises correctly.</i>                                                                                                                                                                                                                                                                                      | Clinical Nurse Specialist |
| 9  |                                                                                                                      | <i>My issue would be if we use this app after two weeks should we not be progressing their exercises so you're no longer going to be performing those exercises.</i>                                                                                                                                                                                             | Physiotherapist           |
| 10 |                                                                                                                      | <i>The only thing is some of the nuances in rehab, it's obviously not going to pick up on. Such as Such as still 3-4/52 post TKR. Still absent in last 10 of knee extension, so they're going to look like they're doing the exercise well, this is going to tell you they're doing the reps of a knee bend well – what's the quality of the knee bend like?</i> | Physiotherapist           |
| 11 | <i>You'll always modify the generic programme to a certain person who lacks flexion v extension, strength v ROM.</i> | Physiotherapist                                                                                                                                                                                                                                                                                                                                                  |                           |

|  |                                                                                                                                                                                                                                                                                                                                                                                                                                                                                                                                                                                                                                             |                           |
|--|---------------------------------------------------------------------------------------------------------------------------------------------------------------------------------------------------------------------------------------------------------------------------------------------------------------------------------------------------------------------------------------------------------------------------------------------------------------------------------------------------------------------------------------------------------------------------------------------------------------------------------------------|---------------------------|
|  | <p><i>Some people would see that as a tool for assisting self-management, other people no matter how much education or technology you provide, will still see their recovery as incumbent on the healthcare professional looking after them.</i></p>                                                                                                                                                                                                                                                                                                                                                                                        | Clinical Nurse Specialist |
|  | <p><i>I think the patients that come in with a non-compliant element already, I don't know if you're ever going to change their attitudes and beliefs no matter how much information you provide or give them, or how much resource you provide and give them. I just think there may some way of change in them but I don't know if this app or anything else will be it. I don't know if there is technology out there that is designed that may help them, but again that's unknown.</i></p>                                                                                                                                             | Staff Nurse               |
|  | <p><i>I guess it depends who is responsible for their care... I wouldn't want alerts about patients who went home a week ago but are in 10/10 pain. I want to educate that patient and put that responsibility on them, the more we give patients the responsibility the better. By doing that alert it makes the patient more passive and we want to encourage the patient to take responsibility, educate them on taking steps like icing and taking pain medication, and then if it still doesn't settle down, then the patient needs to call. I think if we put the responsibility onto us we're leading down a dangerous path.</i></p> | Physiotherapist           |



## SRQR Checklist

| No.                       | Topic                                                                                                                                                                                                                                                                                                                                                                                                |                                                     |
|---------------------------|------------------------------------------------------------------------------------------------------------------------------------------------------------------------------------------------------------------------------------------------------------------------------------------------------------------------------------------------------------------------------------------------------|-----------------------------------------------------|
| <i>Title and abstract</i> |                                                                                                                                                                                                                                                                                                                                                                                                      |                                                     |
| S1                        | <b>Title</b> - Concise description of the nature and topic of the study<br>Identifying the study as qualitative or indicating the approach (e.g., ethnography, grounded theory) or data collection methods (e.g., interview, focus group) is recommended.                                                                                                                                            | Page 1                                              |
| S2                        | <b>Abstract</b> - Summary of key elements of the study using the abstract format of the intended publication; typically includes background, purpose, methods, results, and conclusions                                                                                                                                                                                                              | Page 2<br>Lines 44 – 65                             |
| <i>Introduction</i>       |                                                                                                                                                                                                                                                                                                                                                                                                      |                                                     |
| S3                        | <b>Problem formulation</b> - Description and significance of the problem/phenomenon studied; review of relevant theory and empirical work; problem statement                                                                                                                                                                                                                                         | Page 3                                              |
| S4                        | <b>Purpose or research question</b> - Purpose of the study and specific objectives or questions                                                                                                                                                                                                                                                                                                      | Page 3<br>Lines 123 – 129                           |
| <i>Methods</i>            |                                                                                                                                                                                                                                                                                                                                                                                                      |                                                     |
| S5                        | <b>Qualitative approach or research paradigm</b> - Qualitative approach (e.g., ethnography, grounded theory, case study, phenomenology, narrative research) and guiding theory if appropriate; identifying the research paradigm (e.g., postpositivist, constructivist/ interpretivist) is also recommended; rationale                                                                               | Page 4<br>Lines 176 – 177                           |
| S6                        | <b>Researcher characteristics and reflexivity</b> - Researchers' characteristics that may influence the research, including personal attributes, qualifications/experience, relationship with participants, assumptions, and/or presuppositions; potential or actual interaction between researchers' characteristics and the research questions, approach, methods, results, and/or transferability | Page 4<br>Lines 177 – 183                           |
| S7                        | <b>Context</b> - Setting/site and salient contextual factors; rationale                                                                                                                                                                                                                                                                                                                              | Page 4<br>Lines 138 – 140                           |
| S8                        | <b>Sampling Strategy</b> - How and why research participants, documents, or events were selected; criteria for deciding when no further sampling was necessary (e.g., sampling saturation); rationale                                                                                                                                                                                                | Pages 4-5<br>Lines 138 – 140.<br>Lines 181 – 183    |
| S9                        | <b>Ethical issues pertaining to human subjects</b> - Documentation of approval by an appropriate ethics review board and participant consent, or explanation for lack thereof; other confidentiality and data security issues                                                                                                                                                                        | Page 4<br>Lines 140 – 142                           |
| S10                       | <b>Data collection methods</b> - Types of data collected; details of data collection procedures including (as appropriate) start and stop dates of data collection and analysis, iterative process, triangulation of sources/methods, and modification of procedures in response to evolving study findings; rationale                                                                               | Pages 4-5<br>Lines 144 – 155.<br>Lines 175 – 183    |
| S11                       | <b>Data collection instruments and technologies</b> - Description of instruments (e.g., interview guides, questionnaires) and devices (e.g., audio recorders) used for data collection; if/how the instrument(s) changed over the course of the study                                                                                                                                                | Page 4<br>Lines 145 – 148.<br>Supplementary file 1. |
| S12                       | <b>Units of study</b> - Number and relevant characteristics of participants, documents, or events included in the study; level of participation (could be reported in results)                                                                                                                                                                                                                       | Page 4<br>Lines 136 – 138                           |

|                         |                                                                                                                                                                                                                                                                                                                                                                                                            |                                             |
|-------------------------|------------------------------------------------------------------------------------------------------------------------------------------------------------------------------------------------------------------------------------------------------------------------------------------------------------------------------------------------------------------------------------------------------------|---------------------------------------------|
| S13                     | <b>Data processing</b> - Methods for processing data prior to and during analysis, including transcription, data entry, data management and security, verification of data integrity, data coding, and anonymization/de-identification of excerpts                                                                                                                                                         | Page 5<br>Lines 175 – 183                   |
| S14                     | <b>Data analysis</b> - Process by which inferences, themes, etc., were identified and developed, including the researchers involved in data analysis; usually references a specific paradigm or approach; rationale                                                                                                                                                                                        | Page 5<br>Lines 175 – 183                   |
| S15                     | <b>Techniques to enhance trustworthiness</b> - Techniques to enhance trustworthiness and credibility of data analysis (e.g., member checking, audit trail, triangulation); rationale                                                                                                                                                                                                                       | Page 5<br>Lines 175 – 183                   |
| <i>Results/findings</i> |                                                                                                                                                                                                                                                                                                                                                                                                            |                                             |
| S16                     | <b>Synthesis and interpretation</b> - Main findings (e.g., interpretations, inferences, and themes); might include development of a theory or model, or integration with prior research or theory                                                                                                                                                                                                          | Pages 5 – 9                                 |
| S17                     | <b>Links to empirical data</b> - Evidence (e.g., quotes, field notes, text excerpts, photographs) to substantiate analytic findings                                                                                                                                                                                                                                                                        | Pages 5 – 9 and<br>Supplementary<br>file 2. |
| <i>Discussion</i>       |                                                                                                                                                                                                                                                                                                                                                                                                            |                                             |
| S18                     | <b>Integration with prior work, implications, transferability and contribution(s) to the field</b> - Short summary of main findings; explanation of how findings and conclusions connect to, support, elaborate on, or challenge conclusions of earlier scholarship; discussion of scope of application/generalizability; identification of unique contribution(s) to scholarship in a discipline or field | Pages 9 – 11                                |
| S19                     | <b>Limitations</b> - Trustworthiness and limitations of findings                                                                                                                                                                                                                                                                                                                                           | Page 11<br>Lines 469 – 481.                 |
| <i>Other</i>            |                                                                                                                                                                                                                                                                                                                                                                                                            |                                             |
| S20                     | <b>Conflicts of interest</b> - Potential sources of influence or perceived influence on study conduct and conclusions; how these were managed                                                                                                                                                                                                                                                              | Page 12<br>Lines 510 – 511                  |
| S21                     | <b>Funding</b> - Sources of funding and other support; role of funders in data collection, interpretation, and reporting                                                                                                                                                                                                                                                                                   | Page 12<br>Lines 513 – 517                  |

# BMJ Open

## Clinician perceptions of a prototype wearable exercise biofeedback system for orthopaedic rehabilitation: a qualitative exploration.

|                                 |                                                                                                                                                                                                                                                                                                                                                                                                                                                                                      |
|---------------------------------|--------------------------------------------------------------------------------------------------------------------------------------------------------------------------------------------------------------------------------------------------------------------------------------------------------------------------------------------------------------------------------------------------------------------------------------------------------------------------------------|
| Journal:                        | <i>BMJ Open</i>                                                                                                                                                                                                                                                                                                                                                                                                                                                                      |
| Manuscript ID                   | bmjopen-2018-026326.R1                                                                                                                                                                                                                                                                                                                                                                                                                                                               |
| Article Type:                   | Research                                                                                                                                                                                                                                                                                                                                                                                                                                                                             |
| Date Submitted by the Author:   | 02-Oct-2018                                                                                                                                                                                                                                                                                                                                                                                                                                                                          |
| Complete List of Authors:       | Argent, Rob; Beacon Hospital, ; University College Dublin, Insight Centre for Data Analytics<br>Slevin, Patrick; University College Dublin, Insight Centre for Data Analytics<br>Bevilacqua, Antonio; University College Dublin, Insight Centre for Data Analytics<br>Neligan, Maurice; Beacon Hospital<br>Daly, Ailish; Beacon Hospital<br>Caulfield, Brian; University College Dublin, Insight Centre for Data Analytics; University College Dublin, Institute of Sport and Health |
| <b>Primary Subject Heading</b>: | Rehabilitation medicine                                                                                                                                                                                                                                                                                                                                                                                                                                                              |
| Secondary Subject Heading:      | Health informatics, Qualitative research, Sports and exercise medicine                                                                                                                                                                                                                                                                                                                                                                                                               |
| Keywords:                       | biofeedback, biomedical technology, exercise therapy, mobile health, QUALITATIVE RESEARCH, ORTHOPAEDIC & TRAUMA SURGERY                                                                                                                                                                                                                                                                                                                                                              |
|                                 |                                                                                                                                                                                                                                                                                                                                                                                                                                                                                      |

SCHOLARONE™  
Manuscripts

1  
2  
3  
4  
5  
6  
7  
8  
9  
10  
11  
12  
13  
14  
15  
16  
17  
18  
19  
20  
21  
22  
23  
24  
25  
26  
27  
28  
29  
30  
31  
32  
33  
34  
35  
36  
37  
38  
39  
40  
41  
42  
43  
44  
45  
46  
47  
48  
49  
50  
51  
52  
53  
54  
55  
56  
57  
58  
59  
60

1 Original Paper

2 Clinician perceptions of a prototype wearable exercise  
3 biofeedback system for orthopaedic rehabilitation: a qualitative  
4 exploration.

5  
6 Rob Argent<sup>1,2,3</sup>

7 Patrick Slevin<sup>2,3</sup>

8 Antonio Bevilacqua<sup>2</sup>

9 Maurice Neligan<sup>1</sup>

10 Ailish Daly<sup>1</sup>

11 Brian Caulfield<sup>2,3</sup>

12  
13 1. Beacon Hospital, Dublin, Ireland

14 2. Insight Centre for Data Analytics, University College Dublin, Ireland

15 3. School of Public Health, Physiotherapy and Sport Science, University College Dublin,  
16 Ireland

17  
18 Corresponding Author:

19 Rob Argent

20 UCD Beacon Hospital Academy

21 Beacon Hospital

22 Sandyford

23 Dublin 18

24 Ireland

25  
26 Phone: +353 (0)1 6504646

27 Email: [rob.argent@insight-centre.org](mailto:rob.argent@insight-centre.org)

28  
29  
30  
31 Word count: 4129

## 41 Original Paper

# 42 Clinician perceptions of a prototype wearable exercise 43 biofeedback system for orthopaedic rehabilitation: a qualitative 44 exploration.

45

### 46 Abstract

47 **Objectives:** This study explores the opinions of orthopaedic healthcare professionals  
48 regarding the opportunities and challenges of using wearable technology in rehabilitation. It  
49 continues to assess the perceived impact of an exemplar exercise biofeedback system that  
50 incorporates wearable sensing, involving the clinician in the user-centred design process, a  
51 valuable step in ensuring ease of implementation, sustained engagement and clinical  
52 relevance.

53 **Design:** This is a qualitative study consisting of one-to-one semi-structured interviews,  
54 including a demonstration of a prototype wearable exercise biofeedback system. Interviews  
55 were audio recorded and transcribed, with thematic analysis conducted of all transcripts.

56 **Setting:** The study was conducted in the orthopaedic department of an acute private  
57 hospital.

58 **Participants:** Ten clinicians from a multidisciplinary team of healthcare professionals  
59 involved in the orthopaedic rehabilitation pathway participated in the study.

60 **Results:** Participants reported that there is currently a challenge in gathering timely and  
61 objective data for the monitoring of patients in orthopaedic rehabilitation. Whilst there are  
62 challenges in ensuring reliability and engagement of biofeedback systems, clinicians  
63 perceive significant value in the use of wearable biofeedback systems such as the exemplar  
64 demonstrated for use following total knee replacement.

65 **Conclusions:** Clinicians see an opportunity for wearable technology to continuously track  
66 data in real-time, and feel that feedback provided to users regarding exercise technique and  
67 adherence can further support the patient at home, although there are clear design and  
68 implementation challenges relating to ensuring technical accuracy and tailoring  
69 rehabilitation to the individual. There was perceived value in the prototype system  
70 demonstrated to participants which supports the ongoing development of such exercise  
71 biofeedback platforms.

72

### 73 Keywords

74 biofeedback; biomedical technology; exercise therapy; orthopedics; mobile health;  
75 qualitative

76

### 77 Strengths and limitations of this study

- 78 - There is a need for innovative solutions to counteract poor adherence and increasing  
79 pressure on patient self-management, and a user-centred design approach with key  
80 stakeholders is recommended.
- 81 - Few studies have investigated clinicians' perceptions of exercise biofeedback  
82 systems and offered the opportunity for healthcare professionals to contribute to  
83 the user-centred design process.

84

85

86

87

88

89

90

91

- 1  
2  
3 84 - This study uses qualitative methods in the form of semi-structured interviews to  
4 85 allow for an in-depth exploration of participant opinions, yet results are of a  
5 86 subjective nature and are not necessarily generalisable.  
6 87 - Study participants were recruited from a number of different disciplines across  
7 88 nursing and therapies, although from a single healthcare institution.  
8  
9 89

## 10 90 Introduction

11 91 It has been estimated over 10% of the population will need a total knee replacement (TKR)  
12 92 by eighty years of age [1]. Home-based exercises following TKR form the mainstay of  
13 93 rehabilitation, with typical physiotherapy programmes consisting of exercises targeted to  
14 94 increase strength, range of movement and function, as well as reduce post-operative  
15 95 complications [2]. However, adherence rates to home-based exercises are alarmingly low,  
16 96 with patients reporting various reasons for non-compliance with the prescribed programme  
17 97 [3, 4]. Patients often report a lack of confidence following discharge from hospital,  
18 98 insecurity surrounding their post-operative expectations, and poor recall of exercise  
19 99 technique [5]. Poor performance of exercise technique such as insufficient range of motion,  
20 100 alignment, or compensatory movements may impact on the efficacy of the rehabilitation  
21 101 programme, and hence the outcome of the procedure [6]. Poor adherence may even lead to  
22 102 further complications, readmission to hospital, additional healthcare costs and prolonged  
23 103 pain and disability for the patient [7].  
24 104

25 105 The lack of support reported by patients may also result from the changing nature of joint  
26 106 replacement surgery globally, moving towards value-based care and a drive for reduction in  
27 107 the length of hospital stay, placing a greater emphasis than ever on the self-management  
28 108 skills of the patient. Healthcare providers need to make the most of the opportunity that  
29 109 new and emerging technologies present [1, 8], and connected health solutions may provide  
30 110 the opportunity to bridge this gap between the home and clinician [3]. With the  
31 111 advancement of sensor technologies and mobile computing platforms, it is now possible to  
32 112 empower patients to self-manage more effectively, acquire data with far greater efficiency,  
33 113 and use this to support the clinician in making more objective, data-driven decisions about  
34 114 clinical care [8]. Inertial measurement units (IMUs) can be used to measure the three-  
35 115 dimensional position of a limb segment and have been shown to be a cost-effective,  
36 116 accurate method of assessing exercise technique in rehabilitation exercises [9–12],  
37 117 presenting the opportunity to build such a classification system into a connected health  
38 118 intervention.  
39 119

40 120 When designing a connected health intervention, in order to promote user-engagement and  
41 121 maximise impact, an iterative design process involving consultation with key stakeholders is  
42 122 recommended throughout the design and development phase to optimise the effectiveness  
43 123 of the system [13, 14]. As well as the patient end-user, clinicians should be encouraged to  
44 124 participate in the design and evaluation of connected health solutions to ensure clinical  
45 125 acceptability [15]. However, there is currently a lack of collaboration between technology  
46 126 developers and healthcare professionals, which in turn is affecting acceptance and adoption  
47 127 of new technologies [15, 16].  
48 128

49 129 The aim of this study was two-fold. In the first instance we sought to perform an exploration  
50 130 of the opportunities and challenges of using wearable technology in rehabilitation after joint  
51  
52  
53  
54  
55  
56  
57  
58  
59  
60

1  
2  
3 131 replacement surgery. Following this, clinicians were provided with a demonstration of an  
4 132 exemplar wearable exercise biofeedback system, and their perceptions of its potential use  
5 133 in the clinical setting were evaluated whilst incorporating the healthcare professional in the  
6 134 user-centred design process.  
7 135

## 8 136 **Methods**

### 9 137 **Patient and Public Involvement**

10 138 No patients or members of the general public were involved in this study.  
11 139

### 12 140 **Participants**

13 141 A total of 10 participants (6 females, 4 males, age: 36.5 [SD 9.06]) from a variety of clinical  
14 142 disciplines (4 Physiotherapists, 2 Clinical Nurse Specialists, 2 Orthopaedic Assistants, 1  
15 143 Occupational Therapist and 1 Staff Nurse) were recruited as a sample of convenience from a  
16 144 private hospital in Dublin, Ireland, and were involved in the care of patients in the  
17 145 orthopaedic joint replacement pathway within the hospital. Potential participants were  
18 146 identified and introduced to the study by an Orthopaedic Consultant (MN) and the Allied  
19 147 Therapies Manager (AD). Each participant signed a consent form prior to commencing the  
20 148 study, and the study protocol was approved by the Beacon Hospital Research Ethics  
21 149 Committee.  
22 150

### 23 151 **Experimental Procedure**

24 152 Participants were required to attend a single hour-long session as part of the study. All  
25 153 interview data were recorded using a Dictaphone and an interview topic guide  
26 154 (Supplemental File 1) was constructed based on the main research questions and aims of  
27 155 the study, in order to ensure consistency between interviews [17]. Prior to introducing the  
28 156 concept and exemplar biofeedback system, and to prevent bias, a semi-structured interview  
29 157 was conducted with each participant to gain an understanding of what methods clinicians  
30 158 are currently using to monitor and provide feedback to patients, the perceived  
31 159 opportunities and challenges of connected health interventions, and their current  
32 160 knowledge of wearable technology. A demonstration of the exemplar wearable exercise  
33 161 biofeedback system was then provided, followed by a further semi-structured interview to  
34 162 identify the perceived impact and clinical implications of such a system.  
35 163

### 36 164 **Prototype Exercise Biofeedback System**

37 165 A prototype has been developed consisting of a single IMU (Shimmer, Dublin, Ireland) and  
38 166 an Android application developed for a tablet computer to be used by the patient in their  
39 167 own home. The IMU is placed on the shank in a neoprene sleeve and is connected via  
40 168 Bluetooth to the Android application on the tablet. As the user exercises, the IMU streams  
41 169 sensor data to the tablet, and an on-screen avatar mirrors the movements and the  
42 170 repetitions are counted for each exercise. At the end of the set, the user is provided with  
43 171 feedback on their technique [11, 18], and if erroneous, advice on how to improve technique  
44 172 is displayed. Patient reported outcomes are captured on a regular basis and the user's  
45 173 progress is also presented graphically to track adherence. An illustration of the user setup is  
46 174 included in figure 1 with screenshot in figure 2.  
47 175

48 176 Insert Figure 1: User setup of biofeedback system with single IMU placed on the shin and  
49 177 associated tablet application (written consent provided for use of image).  
50  
51  
52  
53  
54  
55  
56  
57  
58  
59  
60

178

179

180 Insert figure 2: Screenshot of Android application during exercise mode.

181

## 182 Data Analysis

183 Audio from interview recordings was transcribed and anonymised. Thematic analysis of the  
184 interview transcript took place with a grounded-theory approach [17]. The interview guide  
185 was used to create an early coding template, which was then refined and finalised as further  
186 themes emerged during data analysis [19], conducted by RA (Research Physiotherapist) and  
187 PS (Experienced Qualitative Researcher). A constant comparison approach was taken with  
188 regular cross-checking to ensure reliability of emerging sub-themes with a strong correlation  
189 between researchers [20]. Any outliers were discussed, and agreement reached, with data  
190 saturation agreed when no further themes were occurring in the interview data [17].

191

## 192 Results

193 A summary of results are reported below, additional quotations to support these results can  
194 be found in Supplemental File 2.

195

### 196 Current Methods of Monitoring & Feedback

197 Clinical practice at present tends to rely on a combination of objective and subjective  
198 markers. Participants spoke about the wide-use of range of motion measurement as a key  
199 objective marker following TKR. Additionally, markers such as swelling, pain and functional  
200 scores are used to monitor changes in the patient's condition.

201

202 *Generally, I would manually take objective measures, traditional measures such as*  
203 *muscle strength, range of motion, and then some subjective ones as well, opinion*  
204 *based on movement quality. [Physiotherapist]*

205

206 However, participants commented on the lack of objectivity of assessing muscle strength,  
207 gait and exercise technique, with visual assessment and patient self-report forming the basis  
208 for ongoing monitoring.

209

210 *Objective markers are few and far between and we're still reliant on the old clinical*  
211 *measures like range of motion, muscle strength - which if you're testing on an Oxford*  
212 *scale it's a very subjective thing. [Physiotherapist]*

213

214 Those participants working in the post-acute phase of care stated that feedback was  
215 primarily offered verbally, and it is not possible to offer other feedback between clinic  
216 appointments.

217

218 *I guess just verbal feedback is our only option... but when they go home we're not*  
219 *giving them any feedback 'til they come back to the clinic. [Physiotherapist]*

220

### 221 Perceptions & Knowledge of Wearables

222 Participants were aware of wearable technology, with many stating they have used some  
223 sort of wearable device in their personal lives, yet discussion was almost exclusively on the  
224 application in the fitness space.

224



1  
2  
3 225  
4 226 *The apps on the smartphone that you have to have a phone in your pocket for the*  
5 227 *app to work and it tracks how many steps you've done... I know about Fitbit. [Clinical*  
6 228 *Nurse Specialist]*  
7 229

8  
9 230 Participants also discussed the motivational aspect associated with using a wearable device.  
10 231 They felt that as well as motivating the user to meet their goals, the opportunity to track  
11 232 their own data and analyse their results was of benefit.  
12 233

13 234 *You kind of got little rewards or prompts from it you know, 'congratulations you've*  
14 235 *done 5 days in a row' and I liked that. [Occupational Therapist]*  
15 236

16 237 Drawbacks of such technology were also highlighted. One participant felt that it would not  
17 238 be beneficial for them to use wearables themselves, with others reporting the amount of  
18 239 choice being overwhelming, and questioning the validity of such measures.  
20 240

21 241 *How can it differentiate between height and weight, and I don't know that is always*  
22 242 *taken into account with some of these technologies. [Clinical Nurse Specialist]*  
23 243

#### 24 244 Opportunities & Challenges for Connected Health in Orthopaedic Rehabilitation

25 245 Participants were unanimous in agreement that there is an opportunity and wide scope for  
26 246 connected health interventions, including wearable and mobile technology, to play a role in  
27 247 orthopaedic rehabilitation.  
29 248

30 249 *I think there's definitely a place for it, because it's so much more in people's lives*  
31 250 *than ever. Lots of people like apps now and they like to tag into something, and if it*  
32 251 *can give more specific individual feedback then there's definitely a role for it to be a*  
33 252 *part of their progression, especially resulting in something that will rehab for months.*  
34 253 *[Physiotherapist]*  
36 254

37 255 A number of potential features were highlighted that clinicians would consider useful, such  
38 256 as progress tracking, feedback, remote monitoring, regular range of motion measurement,  
39 257 and counting repetitions.  
41 258

42 259 *Even something like a Fitbit that showed a graph that you can go and check if they've*  
43 260 *actually done their exercise and if they've achieved their targets. [Staff Nurse]*  
44 261

45 262 *I love the idea of real-time feedback, the idea something can tell you you're doing*  
46 263 *something wrong immediately and help you correct it. [Occupational Therapist]*  
47 264

48 265 Participants were also quick to point out the challenges of delivering healthcare solutions in  
49 266 this way. All participants interviewed stated that the usability of any technology would be a  
50 267 significant barrier to engagement that will need to be overcome.  
52 268

53 269 *I mean if the interface is difficult or if something, if errors keep occurring. I think the*  
54 270 *more simple a thing is and the more intuitive it is, the easier it will be from an uptake*  
55 271 *and ongoing compliance issue. [Occupational Therapist]*  
56 271

1  
2  
3 272

4 273 Compliance with use of any connected health intervention was widely reported to be a  
5 274 challenge.

6 275

7 276 *I think there are an awful lot of opportunities there but a lot of it comes down to*  
8 277 *patient compliance.* [Clinical Nurse Specialist]

9 278

10 279 There were additional challenges relating to the reliability and validity of any such  
11 280 technology, with discussion of aspects such as internet capability, bugs and glitches.

12 281

13 282 *The technology actually working, how many times you know, the lack of Wi-Fi,*  
14 283 *computer crashing... I suppose they would be the huge elements.* [Clinical Nurse  
15 284 Specialist]

16 285

17 286 Data security challenges were also noted, with the potential for confidential healthcare data  
18 287 being accessed without permission.

19 288

20 289 *One would have said data protection, that's always going to be your main challenge.*  
21 290 [Clinical Nurse Specialist]

22 291

23 292 Participants also spoke of the important balance in the patient-clinician relationship, and  
24 293 the need for technology to enhance the role of the professional, rather than attempt to  
25 294 replace the clinician. It was noted that such technologies need to work without shifting the  
26 295 focus away from the patient's own self-management.

27 296

28 297 *So I would think with technology the person who has to be driving the connection is*  
29 298 *the patient.* [Clinical Nurse Specialist]

30 299

31 300 The final notable sub-theme to arise when discussing challenges of connected health  
32 301 systems, is the user's own ability and confidence with technology.

33 302

34 303 *If you look at the elderly population that are primarily receiving joint replacements,*  
35 304 *are a lot of them au fait with? Some of them would be but presumably there are a*  
36 305 *large percentage who aren't au fait with iPads, iPhone and similar technologies.*  
37 306 [Physiotherapist]

38 307

39 308 However other participants offered counter arguments that this may not be the case  
40 309 compared to years gone by.

41 310

42 311 *I suppose, a lot of people have the technology, that's not as much a barrier. It's so*  
43 312 *accessible now on smartphones and so many people have smartphones... I'm seeing*  
44 313 *90-year olds using Skype and Facebook and I think that barrier is reducing.*  
45 314 [Occupational Therapist]

46 315

#### 47 316 Perceived Impact of Exemplar System

48 317 Having completed a demonstration of the prototype exercise biofeedback system as  
49 318 described above, all participants perceived this system as potentially having a positive

1  
2  
3 319 impact in orthopaedic rehabilitation. Every participant noted the ability to capture and track  
4 320 data in a manner that has not previously been possible as a major benefit. Participants were  
5 321 excited by the prospect of tracking and leveraging metrics such as adherence, difficulty, pain  
6 322 and mood to guide their decisions.  
7 323

8 324 *Then at least you can track as well, to see if they're actually using it at all. Because if*  
9 325 *they're not using it then they're likely not doing anything.* [Physiotherapist]  
10 326

11 327 *One of my favourite things about it is that you can score the difficulty, if somebody is*  
12 328 *scoring 5,5,5 then they're finding it too difficult but if they're scoring 1,1,1 you can*  
13 329 *progress them on very quickly.* [Physiotherapist]  
14 330

15 331 They also felt using this system would improve the outcome of rehabilitation. They  
16 332 suggested that if the patient was demonstrating greater adherence, this would be of  
17 333 benefit.  
18 334

19 335 *It'll improve the quality of the patient's rehab. So I think they will be more likely to*  
20 336 *follow more structured programmes when they have the visual feedback to do it.*  
21 337 [Physiotherapist]  
22 338

23 339 *I think they would rehab quicker and be more confident in their rehab, which is the*  
24 340 *best thing.* [Staff Nurse]  
25 341

26 342 Through instilling added reassurance and motivation, clinicians felt that this system could  
27 343 improve the patient experience.  
28 344

29 345 *I think it will enhance patient confidence in their recovery... it's reassuring to know*  
30 346 *you're on track.* [Clinical Nurse Specialist]  
31 347

32 348 Participants suggested this system could contribute to a more efficient healthcare system,  
33 349 both for the patient and the service provider.  
34 350

35 351 *... you're hopefully not going to need MUA's (Manipulation under anaesthetic) and*  
36 352 *that kind of thing because you're doing it right from the beginning.* [Staff Nurse]  
37 353

38 354 *As a patient, I would imagine that if I was doing my exercises correctly, I would need*  
39 355 *less appointment time with a physiotherapist... If I wasn't doing the exercises*  
40 356 *correctly, the physiotherapist might call me to go through how to do it, but if I'm*  
41 357 *doing my exercises correctly, if I'm reaching the goals I need to and the activity levels*  
42 358 *that I need to, why do I need to come in and see a physio?* [Clinical Nurse Specialist]  
43 359

## 360 Challenges

361 Participants also felt that this increased efficiency could emerge as a challenge however, as  
362 there is a risk of the patient placing a reliance on the technology over the human. Although  
363 there was an acknowledgement from some that this would not be the case.  
364

1  
2  
3 365 *As long as I follow it... I wouldn't go and see the physio again.* [Orthopaedic  
4 366 Assistant]

5 367  
6 368 *It's not going to take the place of the therapist you know, but it just serves to really*  
7 369 *hammer home the message you're trying to get across to the patient.*  
8 370 [Physiotherapist]

9 371  
10 372 A major challenge for such a system which was discussed by five clinicians, related to the  
11 373 accuracy of the data provided by the technology.

12 374  
13 375 *The worry that it won't be giving you the right information and then it's going to*  
14 376 *skew your thought process and that of others because you can only report on what*  
15 377 *you're being given.* [Physiotherapist]

16 378  
17 379 Interviews highlighted the difficulty of tailoring an automated programme to the individual,  
18 380 with only a small number of standard exercises included in this system compared to the  
19 381 breadth of options prescribed in clinical practice.

20 382  
21 383 *My issue would be if we use this app after two weeks should we not be progressing*  
22 384 *their exercises so you're no longer going to be performing those exercises.*  
23 385 [Physiotherapist]

24 386  
25 387 An interesting discussion evolved with a number of participants relating to what a system  
26 388 such as this would do for the responsibility of care, with some clinicians stating that they  
27 389 feel no amount of technology will promote self-management.

28 390  
29 391 *Some people would see that as a tool for assisting self-management, other people no*  
30 392 *matter how much education or technology you provide, will still see their recovery as*  
31 393 *incumbent on the healthcare professional looking after them.* [Clinical Nurse  
32 394 Specialist]

33 395  
34 396 One feature of the remote monitoring aspect of the prototype system is to send an alert to  
35 397 the clinician if there is a concerning change in the data, but some participants stated that  
36 398 the responsibility of the clinician would have to be clearly defined in this instance, in order  
37 399 not to detract from the patient's own self-management.

40 400  
41 401 *I guess it depends who is responsible for their care... I wouldn't want alerts about*  
42 402 *patients who went home a week ago but are in 10/10 pain. I want to educate that*  
43 403 *patient and put that responsibility on them, the more we give patients the*  
44 404 *responsibility the better. By doing that alert it makes the patient more passive and*  
45 405 *we want to encourage the patient to take responsibility, educate them on taking*  
46 406 *steps like icing and taking pain medication, and then if it still doesn't settle down,*  
47 407 *then the patient needs to call. I think if we put the responsibility onto us we're*  
48 408 *leading down a dangerous path.* [Physiotherapist]

49 409  
50  
51  
52  
53  
54  
55  
56  
57  
58  
59

## 410 Discussion

### 411 Principal Findings

412 This study has found that clinicians see technology as having the potential to improve and  
413 assist the rehabilitation process, but there are numerous barriers to overcome when  
414 designing such solutions. Clinicians highlighted a need for a solution which deals with the  
415 issue of exercise adherence and lack of support for patients at home [4, 5]. When  
416 presented with a demonstration of the prototype system, all participants felt that this type  
417 of technology has the potential to positively impact on the outcomes of orthopaedic  
418 rehabilitation, however there are challenges in ensuring the accuracy of information  
419 provided, and the ability to tailor such systems to the individual. There was strong interest  
420 in the opportunity to track data and maximise the effectiveness of rehabilitation, yet it was  
421 felt that such systems can undergo further iterations to extend this impact.

422  
423 Current clinical practice provides little opportunity for monitoring or feedback outside of the  
424 clinic. It has been shown that patients with negative experiences of TKR have unmet needs  
425 regarding support and managing expectations [21], yet these results suggest there is a  
426 heavy reliance on the patient's own self-motivation at home, with limited monitoring or  
427 feedback from clinicians. Participants also reported using a combination of objective and  
428 subjective outcome measures for monitoring, but these measures are only captured at  
429 limited time-points and self-reported measures such as adherence are well reported to be  
430 unreliable [4, 22]. The results from this study would suggest there is benefit in capturing  
431 further objective outcome measures such as movement quality, or accurate monitoring of  
432 range of movement and adherence remotely, both of which are feasible with the use of  
433 IMUs [3, 23].

434  
435 There is growing evidence that clinicians see wearable devices supporting various aspects of  
436 assessment and intervention in rehabilitation [24, 25], and the results of this study further  
437 add to this evidence. Furthermore these findings show that clinicians share the concerns  
438 reported in the literature relating to usability, data protection and reliability, that are known  
439 to be problematic with wearable devices [26–28]. Many researchers are investigating the  
440 technical feasibility of using wearable sensing systems to support rehabilitation [29–32], but  
441 in a recent systematic review, few have conducted user evaluations to guide the design of  
442 such systems in a user-centred manner [33].

### 444 Prototype System Evaluation

445 Most clinicians believed the demonstrated prototype would improve the quality of patient  
446 rehabilitation by fostering greater motivation and self-efficacy, underpinned by the concept  
447 of persuasive technology [34, 35]. Clinicians were also excited by the opportunity to capture  
448 timely and objective data in a manner not currently available in practice [8]. It was felt that  
449 this data-driven aspect could enhance clinical decision making, a perceived benefit that  
450 could increase usefulness and facilitate technology acceptance [36]. It is perceived that this  
451 system could increase adherence to exercise programmes by using evidence based  
452 interventions discussed in the literature to improve adherence in an automated manner [3,  
453 37–39]. Interestingly, several participants felt this system had the potential to improve the  
454 efficiency of the healthcare system, by harnessing the data collected to make better use of  
455 appointment scheduling, which has been highlighted as a design requirement by healthcare  
456 professionals previously [15, 24]. Existing literature has shown the ability of IMU based

1  
2  
3 457 systems to record and classify exercise technique [11, 18], and this study has highlighted the  
4 458 clinical applications of such work.  
5 459

### 6 460 Challenges

7 461 There were conflicting reports within these results as to whether such a system could lead  
8 462 to a reliance on technology rather than the clinician, however previous research has  
9 463 suggested healthcare professionals see technology as having the ability to augment the  
10 464 clinician's decision-making process, rather than seek to replace the human expert [24].  
11 465 There was also concern that this system might increase the responsibility clinicians have for  
12 466 their patients by sending alerts, although this may be used to illustrate shortcomings in  
13 467 current practice. A clinician may consider a user educated in self-management and not wish  
14 468 for alerts, yet if this user continues to report severe symptoms, either the success of  
15 469 education is questionable or further assessment is required. When developing such systems,  
16 470 there is also a need to allow for customisation of exercise programmes from the clinician,  
17 471 with participants highlighting the variance between individuals, the need for a larger  
18 472 exercise library, and the desire to choose when progressions should be offered. The major  
19 473 challenge in the development of such a support system which harnesses machine learning  
20 474 technology is in ensuring the accuracy and reliability of the information provided, as  
21 475 clinicians were concerned that inaccuracy could negatively impact user engagement. This  
22 476 study has shown the need for clear and transparent real-world validation, and end-user  
23 477 evaluation of any such system prior to implementation, an aspect that is lacking in the  
24 478 current literature [28, 33].  
25 479

### 26 480 Limitations

27 481 Due to the qualitative nature of this study, there are number of factors to consider when  
28 482 reviewing this research. All participants were provided with a demonstration of the  
29 483 prototype system on one occasion only. It is quite possible that with ongoing use, or given  
30 484 further time to reflect on the system, the participant's opinions may change. It is important  
31 485 to highlight that these results are derived solely from the participants' own opinions via  
32 486 interviews, and in order to determine the objective clinical impact of such a system, further  
33 487 research needs to take place in the form of a longitudinal study assessing a variety of  
34 488 outcomes with a mixed-methods approach. This sample was selected from a single  
35 489 institution in the private healthcare sector, and whilst this sample comes from a cross-  
36 490 section of the multidisciplinary team, it does not guarantee that the opinions provided  
37 491 reflect the wider population of rehabilitation professionals. Finally, the purpose of this study  
38 492 was to assess clinician perceptions of wearable systems, nonetheless the lack of patient  
39 493 involvement is a limitation in this study. Despite these limitations, this paper provides  
40 494 evidence to support the need, ongoing design and development, and use of such systems in  
41 495 clinical practice.  
42 496

### 43 497 Future Work

44 498 Having now understood that there is a positive perceived impact for this system, future  
45 499 work will seek to deploy the platform as part of a pilot study with patients following TKR  
46 500 surgery. This work will seek to answer some of the questions posed by participants in this  
47 501 study relating to usability and engagement, while including the patient as well as the  
48 502 clinician in the design process to develop further iterations, prior to objective assessment of  
49 503 clinical impact and real-world validation.  
50  
51  
52  
53  
54  
55  
56  
57  
58  
59  
60

504

## 505 Conclusions

506 Rehabilitation following joint replacement is complex and varied, yet there is a reliance on  
507 the patient's own self-management and motivation to maximise the effect of the home  
508 exercise programme, with little opportunity for expert monitoring, assessment or feedback  
509 outside of the clinic setting. A prototype system for interactive exercise biofeedback  
510 consisting of a single wearable sensor and an Android application was perceived to  
511 potentially have a positive impact on the rehabilitation of patients following knee  
512 replacement surgery. Clinicians were excited by the opportunity to continuously track data  
513 in real-time, and felt the exercise technique and adherence feedback would further support  
514 the patient in the home environment. However, there are challenges in the design and  
515 implementation of such systems to ensure acceptability. In order to achieve successful  
516 deployment, these technologies need to be evaluated by clinicians as well as patients as the  
517 end-users, alongside real-world validation of the technical aspects of any such platforms.

518

## 519 Contributorship

520 RA, PS, AD and BC conceived and designed the study. RA conducted the recruitment and  
521 data collection with the assistance of PS, AD and MN. AB contributed to the development  
522 of the prototype biofeedback system. RA and PS conducted the data analyses and drafted  
523 and revised the manuscript. All authors read and approved the final manuscript.

524

## 525 Competing Interests

526 The authors declare that there is no conflict of interest.

527

## 528 Funding

529 This project forms part of the CHES (Connected Health Early Stage Researcher Support  
530 System) Innovation Training Network and has received funding from the European Union's  
531 Horizon 2020 research and innovation programme under the Marie Skłodowska-Curie grant  
532 agreement No. 676201.

533

## 534 Acknowledgements

535 The authors wish to acknowledge Tahar Kechadi for his assistance in the development of the  
536 prototype biofeedback system.

537

## 538 Ethical Approval

539 The research ethics committee of Beacon Hospital approved this study (REF: BEA0065).

540

## 541 Data Sharing

542 No additional data available.

543

## 544 References

545

- 546 [1] Kremers HM, Larson DR, Crowson CS, et al. Prevalence of total hip and knee  
547 replacement in the United States. *J Bone Jt Surg Am* 2015; 97: 1386–9355.
- 548 [2] American Academy of Orthopaedic Surgeons. Total Knee Replacement Exercise  
549 Guide, <http://orthoinfo.aaos.org/topic.cfm?topic=a00301> (2017, accessed 24 May

1  
2  
3  
4  
5  
6  
7  
8  
9  
10  
11  
12  
13  
14  
15  
16  
17  
18  
19  
20  
21  
22  
23  
24  
25  
26  
27  
28  
29  
30  
31  
32  
33  
34  
35  
36  
37  
38  
39  
40  
41  
42  
43  
44  
45  
46  
47  
48  
49  
50  
51  
52  
53  
54  
55  
56  
57  
58  
59  
60

- 550 2018).
- 551 [3] Argent R, Daly A, Caulfield B. Patient Involvement With Home-Based Exercise  
552 Programs: Can Connected Health Interventions Influence Adherence? *JMIR mHealth*  
553 *uHealth* 2018; 6: e47.
- 554 [4] Bassett SF. The assessment of patient adherence to physiotherapy rehabilitation.  
555 *New Zeal J Physiother* 2003; 31: 60–66.
- 556 [5] Perry MA, Hudson HS, Meys S, et al. Older adults' experiences regarding discharge  
557 from hospital following orthopaedic intervention: A metasynthesis. *Disabil Rehabil*  
558 2012; 34: 267–278.
- 559 [6] Friedrich M, Cermak T, Maderbacher P. The Effect of Brochure Use Versus Therapist  
560 Teaching on Patients Performing Therapeutic Exercise and on Changes in Impairment  
561 Status. *Phys Ther* 1996; 76: 1082–1088.
- 562 [7] Holden MA, Haywood KL, Potia TA, et al. Recommendations for exercise adherence  
563 measures in musculoskeletal settings: a systematic review and consensus meeting  
564 (protocol). *Syst Rev* 2014; 3: 10.
- 565 [8] Caulfield BM, Donnelly SC. What is connected health and why will it change your  
566 practice? *Qjm* 2013; 106: 703–707.
- 567 [9] Burns A, Greene BR, McGrath MJ, et al. SHIMMER™ – A Wireless Sensor Platform for  
568 Noninvasive Biomedical Research. *IEEE Sens J* 2010; 10: 1527–1534.
- 569 [10] Giggins OM, Persson UM, Caulfield B. Biofeedback in rehabilitation. *J Neuroeng*  
570 *Rehabil* 2013; 10: 1.
- 571 [11] Giggins OM, Sweeney KT, Caulfield B. Rehabilitation exercise assessment using  
572 inertial sensors: a cross-sectional analytical study. *J Neuroeng Rehabil* 2014; 11: 158.
- 573 [12] O'Reilly MA, Whelan D, Ward T, et al. Technology in Strength and Conditioning:  
574 Assessing Bodyweight Squat Technique With Wearable Sensors. *J Strength Cond Res*  
575 2017; 31: 2303–2312.
- 576 [13] Michie S, Yardley L, West R, et al. Developing and evaluating digital interventions to  
577 promote behavior change in health and health care: Recommendations resulting  
578 from an international workshop. *J Med Internet Res*; 19(6).
- 579 [14] Shah SGSS, Robinson I. Benefits of and barriers to involving users in medical device  
580 technology development and evaluation. *Int J Technol Assess Health Care* 2007; 23:  
581 131–7.
- 582 [15] Bergmann JHM, McGregor AH. Body-Worn Sensor Design : What Do Patients and  
583 Clinicians Want ? *Ann Biomed Eng* 2011; 39: 2299–2312.
- 584 [16] Blumenthal J, Wilkinson A, Chignell M. Physiotherapists' and Physiotherapy Students'  
585 Perspectives on the Use of Mobile or Wearable Technology in Their Practice.  
586 *Physiother Canada* 2018; 70: 1–11.
- 587 [17] Ritchie J. *Qualitative research practice: a guide for social science students and*  
588 *researchers*. 2nd ed. Sage Publications Sage CA: Los Angeles, CA, 2014.
- 589 [18] Bevilacqua A, Huang B, Argent R, et al. Automatic Classification of Knee Rehabilitation  
590 Exercises Using a Single Inertial Sensor : a Case Study. In: *2018 IEEE 15th International*  
591 *Conference on Wearable and Implantable Body Sensor Networks (BSN)*. IEEE, 2018,  
592 pp. 21–24.
- 593 [19] Fereday J, Muir-Cochrane E. Demonstrating Rigor Using Thematic Analysis: A Hybrid  
594 Approach of Inductive and Deductive Coding and Theme Development. *Int J Qual*  
595 *Methods* 2006; 5: 80–92.
- 596 [20] Boeije H. A purposeful approach to the constant comparative method in the analysis



- 1  
2  
3 597 of qualitative interviews. *Qual Quant* 2002; 36: 391–409.
- 4 598 [21] Goldsmith LJ, Suryaprakash N, Randall E, et al. The importance of informational,  
5 599 clinical and personal support in patient experience with total knee replacement: A  
6 600 qualitative investigation. *BMC Musculoskelet Disord* 2017; 18: 1–13.
- 7 601 [22] Hall AM, Kamper SJ, Hernon M, et al. Measurement Tools for Adherence to Non-  
8 602 Pharmacologic Self-Management Treatment for Chronic Musculoskeletal Conditions :  
9 603 A Systematic Review. *Arch Phys Med Rehabil* 2015; 96: 552–562.
- 10 604 [23] Cooper G, Sheret I, McMillian L, et al. Inertial sensor-based knee flexion/extension  
11 605 angle estimation. *J Biomech* 2009; 42: 2678–2685.
- 12 606 [24] Papi E, Murtagh GM, McGregor AH. Wearable technologies in osteoarthritis: a  
13 607 qualitative study of clinicians' preferences. *BMJ Open* 2016; 6: e009544.
- 14 608 [25] Sprint G, Cook DJ, Weeks DL. Designing Wearable Sensor-Based Analytics for  
15 609 Quantitative Mobility Assessment. *IEEE Int Conf Smart Comput SMARTCOMP 2016*.
- 16 610 [26] Piwek L, Ellis DA, Andrews S, et al. The Rise of Consumer Health Wearables: Promises  
17 611 and Barriers. *PLoS Med* 2016; 13: e1001953.
- 18 612 [27] Zapata BC, Fernández-Alemán JL, Idri A, et al. Empirical Studies on Usability of  
19 613 mHealth Apps: A Systematic Literature Review. *J Med Syst* 2015; 39: 1–19.
- 20 614 [28] Peake JM, Kerr G, Sullivan JP. A Critical Review of Consumer Wearables, Mobile  
21 615 Applications, and Equipment for Providing Biofeedback, Monitoring Stress, and Sleep  
22 616 in Physically Active Populations. *Front Physiol* 2018; 9: 743.
- 23 617 [29] Ayoade M, Baillie L. A novel knee rehabilitation system for the home. In: *Proceedings*  
24 618 *of the SIGCHI Conference on human factors in computing systems*. ACM, 2014, pp.  
25 619 2521–2530.
- 26 620 [30] Chen KH, Chen PC, Liu KC, et al. Wearable sensor-based rehabilitation exercise  
27 621 assessment for knee osteoarthritis. *Sensors (Switzerland)* 2015; 15: 4193–4211.
- 28 622 [31] Brutovský J, Novák D. Low-cost motivated rehabilitation system for post-operation  
29 623 exercises. *Annu Int Conf IEEE Eng Med Biol - Proc* 2006; 6663–6666.
- 30 624 [32] Kos A, Tomažič S, Umek A. Suitability of smartphone inertial sensors for real-time  
31 625 biofeedback applications. *Sensors* 2016; 16: 301.
- 32 626 [33] O'Reilly M, Caulfield B, Ward T, et al. Wearable Inertial Sensor Systems for Lower  
33 627 Limb Exercise Detection and Evaluation: A Systematic Review. *Sport Med* 2018; 48:  
34 628 1221–1246.
- 35 629 [34] Fogg BJ. *Persuasive Technology: Using Computers to Change What We Think and Do*.  
36 630 San Francisco, CA: Morgan Kaufmann, 2003.
- 37 631 [35] Chow Y-W, Susilo W, Phillips JG, et al. Video Games and Virtual Reality as Persuasive  
38 632 Technologies for Health Care: An Overview. *J Wirel Mob Networks, Ubiquitous*  
39 633 *Comput Dependable Appl* 2017; 8(3): 18–35.
- 40 634 [36] Holden RJ, Karsh BT. The Technology Acceptance Model: Its past and its future in  
41 635 health care. *J Biomed Inform* 2010; 43: 159–172.
- 42 636 [37] Jack K, McLean SM, Moffett JK, et al. Barriers to treatment adherence in  
43 637 physiotherapy outpatient clinics: A systematic review. *Man Ther* 2010; 15: 220–228.
- 44 638 [38] Jordan JL, Holden MA, Mason EE, et al. Interventions to improve adherence to  
45 639 exercise for chronic musculoskeletal pain in adults. *Cochrane Database Syst Rev* 2010;  
46 640 1: CD005956.
- 47 641 [39] Peek K, Sanson-Fisher R, Mackenzie L, et al. Interventions to aid patient adherence to  
48 642 physiotherapist prescribed self-management strategies: a systematic review.  
49 643 *Physiotherapy* 2016; 102: 127–135.

1  
2  
3 644  
4 645  
5  
6  
7  
8  
9  
10  
11  
12  
13  
14  
15  
16  
17  
18  
19  
20  
21  
22  
23  
24  
25  
26  
27  
28  
29  
30  
31  
32  
33  
34  
35  
36  
37  
38  
39  
40  
41  
42  
43  
44  
45  
46  
47  
48  
49  
50  
51  
52  
53  
54  
55  
56  
57  
58  
59  
60

For peer review only

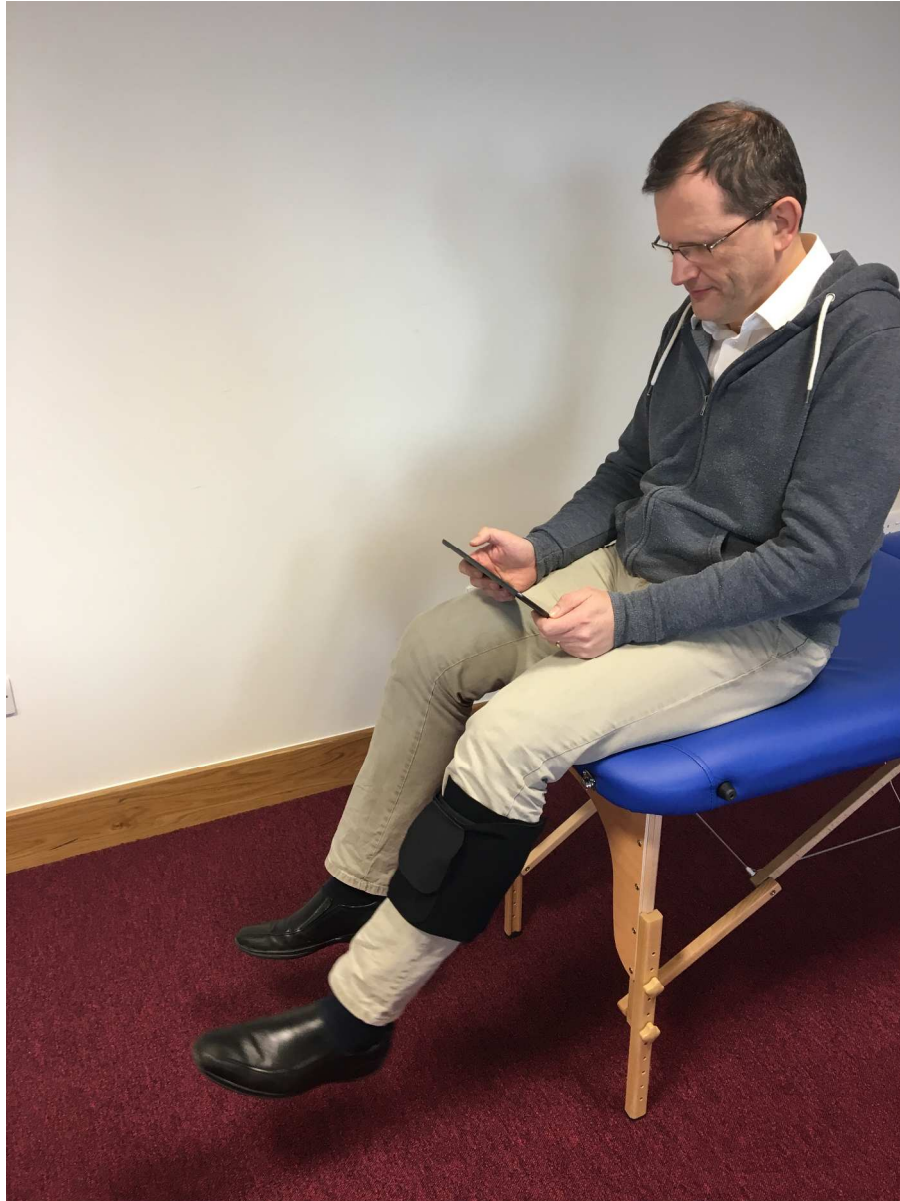

Figure 1: User setup of biofeedback system with single IMU placed on the shin and associated tablet application (written consent provided for use of image).

1066x1422mm (72 x 72 DPI)

1  
2  
3  
4  
5  
6  
7  
8  
9  
10  
11  
12  
13  
14  
15  
16  
17  
18  
19  
20  
21  
22  
23  
24  
25  
26  
27  
28  
29  
30  
31  
32  
33  
34  
35  
36  
37  
38  
39  
40  
41  
42  
43  
44  
45  
46  
47  
48  
49  
50  
51  
52  
53  
54  
55  
56  
57  
58  
59  
60

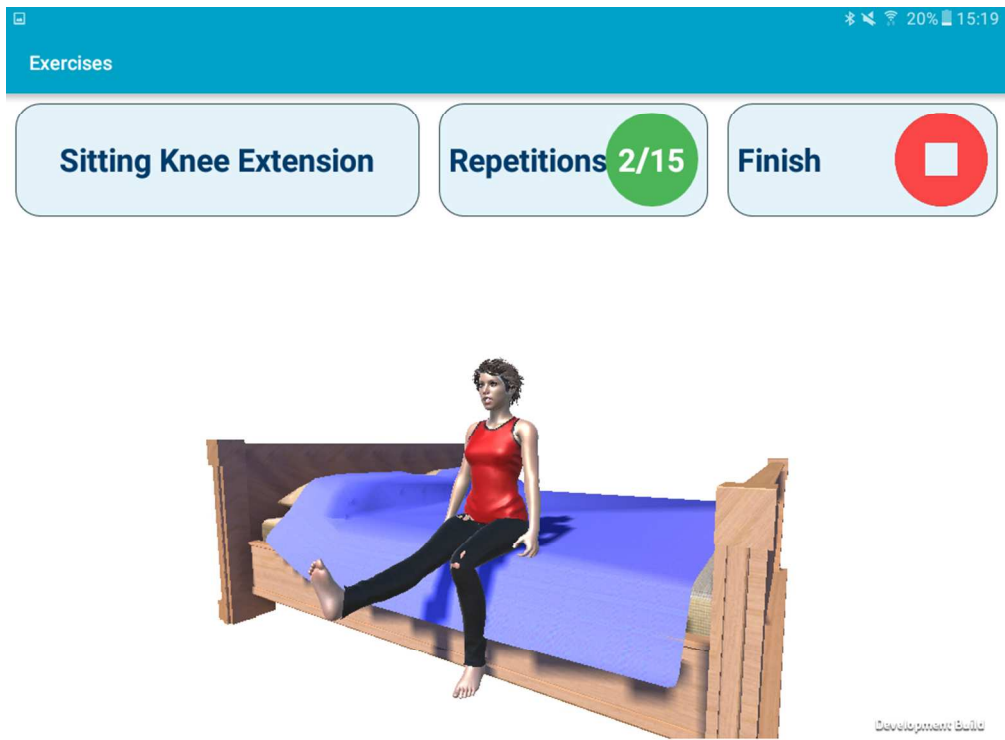

Figure 2: Screenshot of Android application during exercise mode.

361x270mm (72 x 72 DPI)

## SUPPLEMENTAL FILE 1: INTERVIEW TOPIC GUIDE

**Main questions formed the core structure of the interview, further follow-up questions were put forward dependent on initial response.**

- What methods would you currently use for monitoring and feedback during patient rehabilitation?

*Example of follow-up questions:*

- *What about outside of the clinic?*
- *When do you employ these methods?*
- *Does that provide the information that you need? Why?*

- Do you know anything about wearable technology?

*Example of follow-up questions:*

- *If so tell me what you know, how they're used and your view of them.*
- *Why do you have that view of them?*
- *What do you think are the benefits / drawbacks of those you're aware of?*

- What do you think are the opportunities of using technology in orthopaedic rehabilitation?

*Example of follow-up questions:*

- *Have you been involved in / are you aware of any projects taking place?*
- *Why do you think technology might help in that instance?*

- Equally what do you think are the challenges?

*Example of follow-up questions:*

- *What do you think the risk would be when encountering that challenge?*
- *How do you think those challenges could be overcome?*

- What do you think of the role of mobile phones and tablets in monitoring of patients?

*Example of follow-up questions:*

- *You say you think it'd be useful, in what way could it help?*
- *Why do you think smart phones can play that role?*

DEMONSTRATION OF EXEMPLAR SYSTEM PROVIDED

- Having used this technology, what do you think about using software like this for this purpose?

*Example of follow-up questions:*

- *Why does this system have that effect?*
- *You think it'll improve the quality of rehabilitation – How?*

- 1  
2  
3  
4  
5 - How did you find using this particular application?  
6  
7  
8 - What impact do you think this could have for patient rehabilitation?

9 *Example of follow-up questions:*

- 10 • *And what about any impact on your practice?*  
11 • *How do you see the difference using that might have on the way you work?*  
12  
13

- 14 - Based on your experience, what could be improved in the system?

15 *Example of follow-up questions:*

- 16 • *What did you think about the way the information was presented in the app?*  
17 • *Did you encounter any difficulties whilst using the software, any tasks that*  
18 *you found difficult or technical issues?*  
19 • *How would you comment on the user experience of the system?*  
20 • *What else needs to be considered in the design of the system?*  
21  
22  
23  
24  
25  
26  
27  
28  
29  
30  
31  
32  
33  
34  
35  
36  
37  
38  
39  
40  
41  
42  
43  
44  
45  
46  
47  
48  
49  
50  
51  
52  
53  
54  
55  
56  
57  
58  
59  
60

## CODE-BOOK: CLINICIANS INTERVIEW DATA

### PRIMARY THEME: CURRENT PRACTICE

| Sub-theme     | Description                                                                                       | Quotations                                                                                                                                                                                                                                                                                                                                                                                             | Participant               |
|---------------|---------------------------------------------------------------------------------------------------|--------------------------------------------------------------------------------------------------------------------------------------------------------------------------------------------------------------------------------------------------------------------------------------------------------------------------------------------------------------------------------------------------------|---------------------------|
| Measures Used | References relating to how data is currently collected: what metric it is and how it is measured. | <i>Generally, I would manually take objective measures, traditional measures like muscle strength, range of motion, and then some subjective ones as well, opinion based on movement quality.</i>                                                                                                                                                                                                      | Physiotherapist           |
|               |                                                                                                   | <i>We use the goniometer to measure how much flexibility has come into their hip or knee. That's the only indication we can give them by using something as a tool. Otherwise we eyeball and give a rough estimate.</i>                                                                                                                                                                                | Orthopaedic Assistant     |
|               |                                                                                                   | <i>To give an example, the lady that I saw yesterday she was 3 weeks and 6 days after her knee replacement and had 130 degree knee bend. Whereas I know from doing this job and from seeing a lady earlier on in the week and only has 70 degree knee bend. You can see with the lady who has 130 knee bend she doesn't realise how well she is doing, but she thinks she should be further along.</i> | Clinical Nurse Specialist |
|               |                                                                                                   | <i>Measuring the range with a goniometer but there's a lot of intra reliability issues with it you know, as to whether you're specifically getting the right measure from one to the next so I wouldn't say how valid it is.</i>                                                                                                                                                                       | Physiotherapist           |
|               |                                                                                                   | <i>Say for a knee replacement they have their CPMs so once they start to reach towards their 90 degrees.</i>                                                                                                                                                                                                                                                                                           | Staff Nurse               |
|               |                                                                                                   | <i>I would start out with the swelling, if there's any swelling present around the knee or the hip.</i>                                                                                                                                                                                                                                                                                                | Orthopaedic Assistant     |
|               |                                                                                                   | <i>Any lag with some of their movements they were doing, I would tell them you were lagging yesterday but today you're much better than what you were yesterday.</i>                                                                                                                                                                                                                                   | Orthopaedic Assistant     |
|               |                                                                                                   | <i>We would look for breaking down different parts of their gait, the distance they've walked, the time they would take to do the distance which would give the speed as well, the stepping pattern, the step length.</i>                                                                                                                                                                              | Physiotherapist           |

|                |                                                                                                                                    |                                                                                                                                                                                                                                                                                                                                                                                                        |                           |
|----------------|------------------------------------------------------------------------------------------------------------------------------------|--------------------------------------------------------------------------------------------------------------------------------------------------------------------------------------------------------------------------------------------------------------------------------------------------------------------------------------------------------------------------------------------------------|---------------------------|
|                |                                                                                                                                    | <i>Some patients would use the tick box in the booklet, like a diary, a list of the exercises and dates and times that they can tick it off.</i>                                                                                                                                                                                                                                                       | Physiotherapist           |
|                |                                                                                                                                    | <i>Using scales like pain scales and functionality scales.</i>                                                                                                                                                                                                                                                                                                                                         | Physiotherapist           |
|                |                                                                                                                                    | <i>Decreasing pain reports, or decreasing reports about their pain experience, and decreasing levels of analgesia would be the two outcome measures.</i>                                                                                                                                                                                                                                               | Clinical Nurse Specialist |
|                |                                                                                                                                    | <i>Their pain is another thing we would use as a measure as well to I guess progress, you know often the reason people have had an ortho procedure is because of pain so that's an important thing for the patient to show that they're improving and that's something we would definitely take as an objective measure.</i>                                                                           | Physiotherapist           |
|                |                                                                                                                                    | <i>We're probably not as, like with physio they're looking at ROM and they're commenting specifically on joint range, we're more looking at it from a functional perspective, are they able to you know perform a task in a safe manner whilst adhering to the guidelines that are set out past their surgery.</i>                                                                                     | Occupational Therapist    |
|                |                                                                                                                                    | <i>Returning to function is another important measure, we would check pre-during and post-op, especially pre and post from a function point of view. Are they back doing ADLs, Sport, working. So those type of things we would check. Sometimes it's just asking through subjective questions or others would be questionnaires such as the WOMAC to find out functionally how that is improving.</i> | Physiotherapist           |
|                |                                                                                                                                    | <i>How many can you achieve before you fatigue / movement quality is poor. That's gold.</i>                                                                                                                                                                                                                                                                                                            | Physiotherapist           |
|                |                                                                                                                                    | <i>...but it would be nice to have an objective measure of movement quality to feedback to the patients.</i>                                                                                                                                                                                                                                                                                           | Physiotherapist           |
| Current Issues | References relating to the issues with the current measures that are captured, and the comparison of subjective to objective data. | <i>Objective markers are few and far between and we're still reliant on the old clinical measures like range of motion, muscle strength - which if you're testing on an Oxford scale it's a very subjective thing.</i>                                                                                                                                                                                 | Physiotherapist           |
|                |                                                                                                                                    | <i>I suppose it's a lot of observation and it is quite subjective in a lot of other ways like stair mobility.</i>                                                                                                                                                                                                                                                                                      | Occupational Therapist    |
|                |                                                                                                                                    | <i>Objectively again you'd ask their pain scales, I'll ask them to keep an exercise diary, what duration they would walk, how many times they exercises a day, and again keep a record of it, as if they don't it's just a subjective response.</i>                                                                                                                                                    | Physiotherapist           |



|                       |                                                                                               |                                                                                                                                                                                                                                                                              |                           |
|-----------------------|-----------------------------------------------------------------------------------------------|------------------------------------------------------------------------------------------------------------------------------------------------------------------------------------------------------------------------------------------------------------------------------|---------------------------|
|                       |                                                                                               | <i>Monitoring them you're really just looking at visually just using your visual aids yourself so gauging yourself their progression.</i>                                                                                                                                    | Physiotherapist           |
|                       |                                                                                               | <i>But it is more, kind of, you don't have anything to, how do I say it, you don't have machines. So it is really a more kind of ongoing assessment.</i>                                                                                                                     | Staff Nurse               |
| Feedback & Monitoring | References relating to how feedback and monitoring is conducted/provided in current practice. | <i>I guess just verbal feedback is our only option... but when they go home we're not giving them any feedback 'til they come back to the clinic.</i>                                                                                                                        | Physiotherapist           |
|                       |                                                                                               | <i>Verbal feedback or sometimes written feedback so you're adapting things to their ability... most of the patients in the early post-op phase need it to be clearly documented in front of them to make a change otherwise they forget.</i>                                 | Physiotherapist           |
|                       |                                                                                               | <i>Purely conversation.</i>                                                                                                                                                                                                                                                  | Clinical Nurse Specialist |
|                       |                                                                                               | <i>Some patients themselves have said when they contacted me that they don't know what stage they should be at, even though we provide them with the info at pre assessment beforehand, even though we go through the information when they're here in the hospital.</i>     | Clinical Nurse Specialist |
|                       |                                                                                               | <i>They can call in if they have a problem but between the visits of the teams that are going out once a day over the course of the first week, no they have to get on with it themselves, they don't have anything to work off except what they've been educated to do.</i> | Physiotherapist           |
|                       |                                                                                               | <i>You're not watching them and they're like oh yeah I did my exercises and you just have to go by that they did it.</i>                                                                                                                                                     | Staff Nurse               |

## PRIMARY THEME: WEARABLES

| Sub-theme               | Description                                                                                                                             | Quotations                                                                                                                                                                                                                                                                                                                                             | Participant            |
|-------------------------|-----------------------------------------------------------------------------------------------------------------------------------------|--------------------------------------------------------------------------------------------------------------------------------------------------------------------------------------------------------------------------------------------------------------------------------------------------------------------------------------------------------|------------------------|
| Current Use & Awareness | References relating to participant knowledge of types of wearable devices both in private or professional context.                      | <i>A mobile phone that measures your distance, and measures calories and distance walked and you can go back and check and see exactly what you've done for a day.</i>                                                                                                                                                                                 | Orthopaedic Assistant  |
|                         |                                                                                                                                         | <i>I've used a pedometer here at work when they were trying to get people to take more steps, I have used a HR monitor when training.</i>                                                                                                                                                                                                              | Physiotherapist        |
|                         |                                                                                                                                         | <i>Yes, erm map my run... . I have another mobility app and its more for tracking distance.</i>                                                                                                                                                                                                                                                        | Occupational Therapist |
|                         |                                                                                                                                         | <i>I've used the sensors, the HR monitor sensors and things like that for GAA training in the past and that was more to do specific testing.</i>                                                                                                                                                                                                       | Physiotherapist        |
|                         |                                                                                                                                         | <i>I've used the watch technology for some swim training and some gym training when I was training for specific things.</i>                                                                                                                                                                                                                            | Physiotherapist        |
|                         |                                                                                                                                         | <i>I actually haven't used any wearable technology so there's not much I can tell you to be honest.</i>                                                                                                                                                                                                                                                | Orthopaedic Assistant  |
|                         |                                                                                                                                         | <i>I haven't used any... I know you can get all sorts of apps that'll measure all sorts of objective measurements of sports performance.</i>                                                                                                                                                                                                           | Physiotherapist        |
|                         |                                                                                                                                         | <i>A lot of my patients at the moment all have fitbits for measurements of how many steps do they take per day, a lot of the smartphones obviously have apps as well that record how many calories and steps they're taking, what distance they walked, run, cycle.</i>                                                                                | Physiotherapist        |
| Motivational            | References relating to the use of wearable devices discussed in the current use and awareness sub-theme offering a motivational aspect. | <i>It gives you a sense of achievement. At the end of each session say I've gone for a nice long walk and I've made sure it is uphill/downhill all that stuff you know. If I look at it and say well I've walked 10km I think I'm quite happy with that for a day, you're delighted with yourself so you do get a sense of accomplishment from it.</i> | Orthopaedic Assistant  |
|                         |                                                                                                                                         | <i>The 10k steps definitely does encourage people to be more active, they're more conscious, they're more objective.</i>                                                                                                                                                                                                                               | Physiotherapist        |
|                         |                                                                                                                                         | <i>I just think for the whole kinda like tracking your steps, my friend was showing me hers and it tells you what you've done and what you have to do and you can compete with other people. I think they're quite motivating.</i>                                                                                                                     | Staff Nurse            |

|            |                                                                                                                                                  |                                                                                                                                                                                                                                                                                                             |                           |
|------------|--------------------------------------------------------------------------------------------------------------------------------------------------|-------------------------------------------------------------------------------------------------------------------------------------------------------------------------------------------------------------------------------------------------------------------------------------------------------------|---------------------------|
|            |                                                                                                                                                  | <i>I like it from a motivational point of view and you have an excel spreadsheet and you can compare averages like this time to a year ago.</i>                                                                                                                                                             | Physiotherapist           |
|            |                                                                                                                                                  | <i>And you kind of got little rewards or prompts from it you know, congratulations you've done 5 days in a row and I liked that.</i>                                                                                                                                                                        | Occupational Therapist    |
| Track Data | References relating to the use of wearable devices discussed in the current use and awareness sub-theme providing the opportunity to track data. | <i>Well I suppose I would predominantly have used it for measuring distance, so if I was tracking myself or setting myself a goal for exercise in terms of time and distance, erm, it would have been, it's a useful thing for a tracker.</i>                                                               | Occupational Therapist    |
|            |                                                                                                                                                  | <i>You give a patient an exercise and the subjective they may report one thing but at least with the objective measurements you have something in front of you that they walked 5k in a certain time or they did do a certain amount of steps.</i>                                                          | Physiotherapist           |
|            |                                                                                                                                                  | <i>I think they can be used to encourage people to give feedback, they can see their improvements and if people are into tech they can actually track their different training programmes and log, you can see how you're improving and just from peoples feedback to me some people really like that.</i>  | Orthopaedic Assistant     |
|            |                                                                                                                                                  | <i>I did look at the data but I probably haven't uploaded the data anywhere or done anything more with it than literally monitor anything.</i>                                                                                                                                                              | Clinical Nurse Specialist |
| Negatives  | References relating to perceived challenges and drawbacks of the use of wearable devices discussed in the current use and awareness sub-theme.   | <i>How can it differentiate between height and weight and I don't know if that is always taken into account with some of these technologies.</i>                                                                                                                                                            | Clinical Nurse Specialist |
|            |                                                                                                                                                  | <i>I know there are newer and updated versions of fitbits and other wearables coming out that have HR and calories burnt but again how specific is that to the patient compared to a generalised population.</i>                                                                                            | Physiotherapist           |
|            |                                                                                                                                                  | <i>My opinion is I personally would find it irritating. Why? I hate email reminders, and uninvited contact from companies. For me a fitbit is impractical as we have a bare wrist policy so most of my life it has no relevance to me. But the main block would be uninvited contact.</i>                   | Clinical Nurse Specialist |
|            |                                                                                                                                                  | <i>It's the remote setting of goals, or the setting of goals that you then fail. So your sense of failure overrides your sense of success. I think there's a possibility of the two things happening and I think for me would detract from the benefit of wearing it. If I felt I wasn't meeting goals.</i> | Clinical Nurse Specialist |

1  
2  
3  
4  
5  
6  
7  
8  
9  
10  
11  
12  
13  
14  
15  
16  
17  
18  
19  
20  
21  
22  
23  
24  
25  
26  
27  
28  
29  
30  
31  
32  
33  
34  
35  
36  
37  
38  
39  
40  
41  
42  
43  
44  
45  
46

|  |  |                                                                                                                                                                                                                                                                                                                                                                                            |                 |
|--|--|--------------------------------------------------------------------------------------------------------------------------------------------------------------------------------------------------------------------------------------------------------------------------------------------------------------------------------------------------------------------------------------------|-----------------|
|  |  | <i>There is nearly an obsession that they have to achieve 10k steps when I have seen security guards just marching on the spot rather than just walking.</i>                                                                                                                                                                                                                               | Physiotherapist |
|  |  | <i>I think you can get sick of having that many options available to you. And I think that there's so much choice out there and you never know what one is going to work for you until you have downloaded a few and seen what works best for you and your lifestyle and what you want to use it for.</i>                                                                                  | Staff Nurse     |
|  |  | <i>I don't particularly like being on technology overly so I don't necessarily want to have to go after my run onto my laptop to track my run. I've been involved in sport at a high level for a long time so I have a good understanding myself of how to push myself so I don't need that feedback but I can see how it is really good for people who wouldn't have that background.</i> | Physiotherapist |

## PRIMARY THEME: CONNECTED HEALTH IN ORTHOPAEDICS

| Sub-theme   | Description                                                                                                   | Quotations                                                                                                                                                                                                                                                                                                                                                                                                                                   | Participant               |
|-------------|---------------------------------------------------------------------------------------------------------------|----------------------------------------------------------------------------------------------------------------------------------------------------------------------------------------------------------------------------------------------------------------------------------------------------------------------------------------------------------------------------------------------------------------------------------------------|---------------------------|
| Opportunity | References relating to participants views on where technology could improve patient care / clinical workflow. | <i>I think there's definitely a place for it because it's much more in peoples life than ever. Lots of people like apps now and they like to tag into something and if it can give more specific individual feedback then there's definitely a role for it to be a part of their progression, especially resulting in something that will rehab for months.</i>                                                                              | Physiotherapist           |
|             |                                                                                                               | <i>I suppose if they had an app and stuff on them, do you know they could like, everyone kinda YouTube's stuff and they're not accurate. Everyone's saying oh well that looks like that's what I'm doing but you don't really know. But if you did have the fitbit you could say right well I actually have done it and you just feel a bit more secure I suppose.</i>                                                                       | Staff Nurse               |
|             |                                                                                                               | <i>A lot of GP surgeries are using remote technology with their patients, even medical records are being shared with patients that they then take into their hospital. I mean there's huge growth in that.</i>                                                                                                                                                                                                                               | Clinical Nurse Specialist |
|             |                                                                                                               | <i>Erm I think I've seen a lot of people and proposals in relation to an introduction of kind of these wearables into the health and not just the fitness sector and to do with health and health monitoring so I think there is definitely a huge role to play.</i>                                                                                                                                                                         | Occupational Therapist    |
|             |                                                                                                               | <i>Well I suppose orthopaedic rehab because it's so prescriptive and it's so specific, and I know it had to be personalised and individualised but the exercises are pretty much the exercises you're going to do after a knee surgery or hip surgery so I mean in a way I think its I suppose there aren't as many variables with it.</i>                                                                                                   | Physiotherapist           |
|             |                                                                                                               | <i>I'm a bit of a control freak and I would love if I was a patient if I could have something that easily helped me track my health in terms of my BP, glucose levels, HR, O2 levels. So it took a more holistic view, something that I could track.</i>                                                                                                                                                                                     | Occupational Therapist    |
|             |                                                                                                               | <i>The last job I had in spinal wards where if there was something there, if there's people there and they could see progress on a screen rather than just being told, you're doing great, you're doing fantastic. I'm sure that grinds on people a bit you know. Definitely in the orthopaedic ward, if there's a way of saying this is where you were at the start, now you're here, now you're here I'm sure that would be brilliant.</i> | Orthopaedic Assistant     |

|                    |                                                                                                                  |                                                                                                                                                                                                                                                                                                                                                                                                                                                                         |                           |
|--------------------|------------------------------------------------------------------------------------------------------------------|-------------------------------------------------------------------------------------------------------------------------------------------------------------------------------------------------------------------------------------------------------------------------------------------------------------------------------------------------------------------------------------------------------------------------------------------------------------------------|---------------------------|
|                    |                                                                                                                  | <i>I think it's the future of physiotherapy probably, what we tried to introduce was emailing, there's always going to be some issues with emailing. Not just pictures and descriptions but videos of how an exercise should be performed.</i>                                                                                                                                                                                                                          | Physiotherapist           |
| Potential Features | References relating to desirable features of future technology enabled interventions in the orthopaedic setting. | <i>You can always video call them and see how are you getting on, that way you don't have to physically go to the house to see how they're getting on. They can just show you the exercise.</i>                                                                                                                                                                                                                                                                         | Orthopaedic Assistant     |
|                    |                                                                                                                  | <i>Unless you had the smartphone or something you can communicate with the patient through that, obviously for example you have facetime</i>                                                                                                                                                                                                                                                                                                                            | Staff Nurse               |
|                    |                                                                                                                  | <i>Even something like a fitbit that showed a graph that you can go and check if they've actually done their exercise/if they've achieved their targets. It's very easy to say oh yeah you look like you're doing it right until you kinda see.</i>                                                                                                                                                                                                                     | Staff Nurse               |
|                    |                                                                                                                  | <i>I think it would give the patient an opportunity to give a much more personal record of their experience. And, you know, also a central monitoring or central axis, I mean if you had a patient tablet in a room and a nurse had a smartphone or something in her pocket. That she could check into, and say ok patient in 302 is reporting pain in the last hour, I haven't been in there ill check. Very simple things whereas patients don't always tell you?</i> | Clinical Nurse Specialist |
|                    |                                                                                                                  | <i>Even from an older persons discharging to home perspective from family to be able to see how their health is doing its not this subjective, oh mum started feeling unwell, I think it was 3 or 4 days ago but if something even, just temperatures, something very basic and something very objective that you could measure over time that'd be really helpful.</i>                                                                                                 | Occupational Therapist    |
|                    |                                                                                                                  | <i>How much bend they have on their knee without being strapped to the machine (CPM). Maybe that'd be something in the future that could be even better again, something along those lines.</i>                                                                                                                                                                                                                                                                         | Orthopaedic Assistant     |
|                    |                                                                                                                  | <i>I love the idea of real-time feedback, the idea something can tell you you're doing something wrong immediately and help you correct it. I think some patients having that insight and that awareness and that something to prompt you on the spot because that's what we would sometimes find is that people would get into behaviours or habits of doing things. I'm trying to think about the transition from</i>                                                 | Occupational Therapist    |

|            |                                                                                                                        |                                                                                                                                                                                                                                                                                                                                                                                                           |                           |
|------------|------------------------------------------------------------------------------------------------------------------------|-----------------------------------------------------------------------------------------------------------------------------------------------------------------------------------------------------------------------------------------------------------------------------------------------------------------------------------------------------------------------------------------------------------|---------------------------|
|            |                                                                                                                        | <i>hospital to home, a lot of the time they go home and it's as if we're starting from scratch with them.</i>                                                                                                                                                                                                                                                                                             |                           |
|            |                                                                                                                        | <i>When they come to pre-ops rather than handing them loads of sheets that they're given that information via email or an app so once they come in they download the app and get all that information and say refer them to that during it.</i>                                                                                                                                                           | Clinical Nurse Specialist |
| Challenges | References relating to the potential challenges in design and development of technology based systems in orthopaedics. | <i>Getting the patient to buy in to it is the number one challenge, from everything. A piece of tech that I've used with athletes would be monitoring of their load fitting in their activity duration during their training session to build up their profile of how much training they've done – getting them to use it is a problem but when they do use it its invaluable.</i>                        | Physiotherapist           |
|            |                                                                                                                        | <i>I think there are an awful lot of opportunities there but a lot of it comes down to patient compliance.</i>                                                                                                                                                                                                                                                                                            | Clinical Nurse Specialist |
|            |                                                                                                                        | <i>The more work they have to do the less reliable it is.</i>                                                                                                                                                                                                                                                                                                                                             | Physiotherapist           |
|            |                                                                                                                        | <i>If you expect the patient to go back and log onto a computer to record data you're not going to get it.</i>                                                                                                                                                                                                                                                                                            | Physiotherapist           |
|            |                                                                                                                        | <i>Time... in an outpatient session you've got 30 mins to get them in, assessed, treated, progressed, and then how relative is it going to be taking up your time to look up their adherence levels etc. because if they come in and you see that they've improved and their quality of movement has improved you can be fairly confident they've been adherent to their exercises.</i>                   | Physiotherapist           |
|            |                                                                                                                        | <i>If you don't have a good understanding of the app or the technology itself, it can be quite difficult for someone to use it. For example, if it is someone quite elderly, they wouldn't be as tech savvy as someone in their teens or early twenties. So it's the whole aspect of getting to know about the app or technology before they start using it. That would be the only difficulty there.</i> | Orthopaedic Assistant     |
|            |                                                                                                                        | <i>I suppose how user friendly the app and I suppose that can be a weakness and a strength for patients, depending on the patient age population.</i>                                                                                                                                                                                                                                                     | Clinical Nurse Specialist |
|            |                                                                                                                        | <i>And the big problem is if they cannot use it then it is pointless</i>                                                                                                                                                                                                                                                                                                                                  | Physiotherapist           |

|   |  |                                                                                                                                                                                                                                                                                                                                                                                                                                                                              |                           |
|---|--|------------------------------------------------------------------------------------------------------------------------------------------------------------------------------------------------------------------------------------------------------------------------------------------------------------------------------------------------------------------------------------------------------------------------------------------------------------------------------|---------------------------|
| 1 |  | <i>I mean if the interface is difficult or if something, errors keep occurring, I think the more simple a thing is and the more intuitive it is the easier it will be from an uptake and an ongoing compliance issue.</i>                                                                                                                                                                                                                                                    | Occupational Therapist    |
| 2 |  | <i>The technology actually working, how many times you know, the lack of WIFI, computer crashing. I suppose they would be the huge elements.</i>                                                                                                                                                                                                                                                                                                                             | Clinical Nurse Specialist |
| 3 |  | <i>The ability to pick up on the false in particular because obviously there's going to be a limit to what the technology can do so it needs to be factored towards a specific goal so whatever that is.</i>                                                                                                                                                                                                                                                                 | Physiotherapist           |
| 4 |  | <i>If you look at the elderly population that are primarily getting joint replacements are a lot of them au fait with, some of them would be but there would be presumably a large percentage who aren't au fait with iPad, iPhone and similar technologies.</i>                                                                                                                                                                                                             | Physiotherapist           |
| 5 |  | <i>I suppose, a lot of people have the technology, that's not as much a barrier. It's so accessible now on smartphones and so many people have smartphones I don't really see that as a barrier. Nor do I see the whole age profile of the patients as a barrier because I'm seeing 90 year olds using skype and Facebook and I think that barrier is reducing.</i>                                                                                                          | Occupational Therapist    |
| 6 |  | <i>Yes of course, without being rude and I would put myself in the same bracket, not being ageist. But certain people of an age are fantastic with technology, you know I know we have the silver surfers and that's what they're being christened, but I see a lot in the hospital where they're skyping families – telling them they're feeling well.</i>                                                                                                                  | Orthopaedic Assistant     |
| 7 |  | <i>I think the barriers to technology in health are coming down every day. I see such changes for the older population on the ward now.</i>                                                                                                                                                                                                                                                                                                                                  | Occupational Therapist    |
| 8 |  | <i>One would have said data protection, that's always going to be your main challenge.</i>                                                                                                                                                                                                                                                                                                                                                                                   | Clinical Nurse Specialist |
| 9 |  | <i>So I suppose how can the app be, you know, I know this seems like a strange one, but how many times have we heard of people being hacked, and the technology being there and being stolen and stuff like that and I think unfortunately that's getting more and more common. I don't know if that's something anybody will think of when it comes to this kind of app for healthcare for better patients. But I do think that's something the potential is there for.</i> | Clinical Nurse Specialist |



|  |  |                                                                                                                                                                                                                                                                                                                                                                                                                                                                                                                                                                                                                                        |                           |
|--|--|----------------------------------------------------------------------------------------------------------------------------------------------------------------------------------------------------------------------------------------------------------------------------------------------------------------------------------------------------------------------------------------------------------------------------------------------------------------------------------------------------------------------------------------------------------------------------------------------------------------------------------------|---------------------------|
|  |  | <p><i>So I would think that with technology the person that has to be driving the connection is the patient.</i></p>                                                                                                                                                                                                                                                                                                                                                                                                                                                                                                                   | Clinical Nurse Specialist |
|  |  | <p><i>So you need to overcome that barrier with the patient that they might perceive it as something that you are handing over responsibility when in fact what you're trying to do is get a better understanding to deepen a relationship. You want to use it in a way that enhances the trusting element of the patient-HCP relationship. That has to be the fundamental process. You have to utilise it in a way that actually increases that relationship as opposed to detracts from it.</i></p>                                                                                                                                  | Clinical Nurse Specialist |
|  |  | <p><i>Just that it can't replace actually somebody being there looking at them. Even though you can have two people looking at someone doing an exercise a highly trained physio is going to see what needs to be tweaked in your technique with something. It's very easy to do an exercise that actually is going to ramp up your pain and you can just change it slightly and often you're not, and I don't think tech can replace that part of it but if it's going to be used to iron out the simpler things, but the higher things you need an experienced eye to see I don't necessarily know how you can replace that.</i></p> | Physiotherapist           |

## PRIMARY THEME: PERCEIVED IMPACT OF EXEMPLAR SYSTEM

| Sub-theme       | Description                                                                                            | Quotations                                                                                                                                                                                                                                                                                                  | Participant           |
|-----------------|--------------------------------------------------------------------------------------------------------|-------------------------------------------------------------------------------------------------------------------------------------------------------------------------------------------------------------------------------------------------------------------------------------------------------------|-----------------------|
| Improve Outcome | References relating to a perceived change in clinical outcome with the use of the demonstrated system. | <i>Very useful, I think it'll improve the quality of the patients exercise.</i>                                                                                                                                                                                                                             | Physiotherapist       |
|                 |                                                                                                        | <i>It'll improve the quality of the patients rehab. So I think they will be more likely to follow more structured programmes when they have visual feedback to do it.</i>                                                                                                                                   | Physiotherapist       |
|                 |                                                                                                        | <i>There are times when you could be doing the exercise but you wouldn't know if you were doing it right or wrong so to be told that you are doing the exercises incorrectly it makes you go back and do them properly again that way you know you're getting the best out of it.</i>                       | Orthopaedic Assistant |
|                 |                                                                                                        | <i>I think they'd rehab quicker and be more confident in their rehab, which is the best thing.</i>                                                                                                                                                                                                          | Staff Nurse           |
|                 |                                                                                                        | <i>I think you're going to do the same thing, but at a better standard and a better quality.</i>                                                                                                                                                                                                            | Physiotherapist       |
| Track Data      | References relating to the use of data to monitor patients with the use of the demonstrated system.    | <i>Then at least you can track as well to see if they're actually using it at all. Because if they're not using it then they're likely not doing anything.</i>                                                                                                                                              | Physiotherapist       |
|                 |                                                                                                        | <i>One of my favourite things about it is that you can score the difficulty, if somebody is scoring 555 then they're finding it too difficult but if they're scoring 111 you can progress them on very quickly.</i>                                                                                         | Physiotherapist       |
|                 |                                                                                                        | <i>I like the mood as well in terms of from a depression point of view, they're so much depression out there, these people may act knowledge it and this could pick up a few mental health issues as well.</i>                                                                                              | Physiotherapist       |
|                 |                                                                                                        | <i>It gathers up data and tells you whether the patients are doing the exercises or not. That way if they say they have done it you can say no, you didn't do the exercise I've got the information here so yes its quite good to go back to.</i>                                                           | Staff Nurse           |
|                 |                                                                                                        | <i>The data is automatically taken and you're not physically putting the data into a computer, all you're doing is log into the app and just go onto the page you want to see and put it all together. Instead of spending hours on a computer putting the data in so yeah it'll be a big hit for sure.</i> | Orthopaedic Assistant |

|                       |                                                                                                         |                                                                                                                                                                                                                                                                                                                                                                                                                               |                           |
|-----------------------|---------------------------------------------------------------------------------------------------------|-------------------------------------------------------------------------------------------------------------------------------------------------------------------------------------------------------------------------------------------------------------------------------------------------------------------------------------------------------------------------------------------------------------------------------|---------------------------|
|                       |                                                                                                         | <i>It would change maybe the clinical practice, because if you were noticing a certain surgeons patients experienced more pain, or people discharged over the weekend have higher pain levels, you know then what you're doing is establishing patterns that allow you to intervene.</i>                                                                                                                                      | Clinical Nurse Specialist |
|                       |                                                                                                         | <i>You're always going to see what you see, but this is something where you can record data and it doesn't lie.</i>                                                                                                                                                                                                                                                                                                           | Orthopaedic Assistant     |
|                       |                                                                                                         | <i>I'm very impressed by the spreadsheet at the end that tells you if you've done it correctly or incorrectly, I'm impressed by the graphs and saying the amount of reps performed and if you've done your dosage for the day or over a period.</i>                                                                                                                                                                           | Physiotherapist           |
| Motivation & Support  | References relating to the use of the demonstrated system to provide motivation or support to patients. | <i>I think it will enhance the patient confidence in their recovery... it's reassuring to know you're on track.</i>                                                                                                                                                                                                                                                                                                           | Clinical Nurse Specialist |
|                       |                                                                                                         | <i>There are times when you could be doing the exercise but you wouldn't know if you were doing it right or wrong so to be told that you are doing the exercises incorrectly it makes you go back and do them properly again that way you know you're getting the best out of it.</i>                                                                                                                                         | Orthopaedic Assistant     |
|                       |                                                                                                         | <i>The feedback from the screen, makes you think how am I going to complete these exercises correctly you know.</i>                                                                                                                                                                                                                                                                                                           | Clinical Nurse Specialist |
|                       |                                                                                                         | <i>From their perspective they're getting feedback immediately that they're doing something wrong and there's a prompt to give them the idea of maybe what they're doing and how they could perform the exercise better which is great.</i>                                                                                                                                                                                   | Occupational Therapist    |
|                       |                                                                                                         | <i>Yeah well its correcting you and telling you that you're not doing it properly or that you're doing it perfectly and its nice for people to feel like they have sort of backup when they go home.</i>                                                                                                                                                                                                                      | Staff Nurse               |
|                       |                                                                                                         | <i>I think it will be a fantastic impact on the patient it really would. I can't overemphasise the amount of times that people, when they see themselves progressing they go much further again and it shoots along. They really get a sense of wellbeing, accomplishment all that sort of stuff and they know I'm getting there, I can see I'm getting there. I can visibly see and I can see the data as well you know.</i> | Orthopaedic Assistant     |
| Healthcare Efficiency | References relating to the use of the                                                                   | <i>... you're hopefully not going to need MUA's (Manipulation under anaesthetic) and that kind of thing because you're doing it right from the beginning.</i>                                                                                                                                                                                                                                                                 | Staff Nurse               |

|            |                                                                                                               |                                                                                                                                                                                                                                                                                                                                                                                                                        |                           |
|------------|---------------------------------------------------------------------------------------------------------------|------------------------------------------------------------------------------------------------------------------------------------------------------------------------------------------------------------------------------------------------------------------------------------------------------------------------------------------------------------------------------------------------------------------------|---------------------------|
|            | demonstrated system to improve working practices and healthcare efficiency.                                   | <i>As a patient, I would imagine that if I was doing my exercises correctly, I would need less appointment time with a physiotherapist... If I wasn't doing the exercises correctly, the physiotherapist might call me to go through how to do it, but if I'm doing my exercises correctly, if I'm reaching the goals I need to and the activity levels that I need to, why do I need to come in and see a physio?</i> | Clinical Nurse Specialist |
|            |                                                                                                               | <i>It would even reduce the phone calls in saying I don't know if I'm doing this right or I think I'm doing something wrong because it's there in front of you.</i>                                                                                                                                                                                                                                                    | Staff Nurse               |
|            |                                                                                                               | <i>As a patient I would imagine that if I was doing my exercises correctly, I would need less appointment time with a physiotherapist. Particularly if I'm paying for it.</i>                                                                                                                                                                                                                                          | Clinical Nurse Specialist |
|            |                                                                                                               | <i>It would save them from travelling out of the house, a lot of patients would struggle to get a lift to the hospital and trying to manage around people's workloads to get lifts.</i>                                                                                                                                                                                                                                | Orthopaedic Assistant     |
| Challenges | References relating to the perceived challenges and risks associated with the use of the demonstrated system. | <i>As long as I follow it... I wouldn't go and see the physio again.</i>                                                                                                                                                                                                                                                                                                                                               | Orthopaedic Assistant     |
|            |                                                                                                               | <i>It's not going to take the place of the therapist you know, but it just serves to really hammer home the message you're trying to get across to the patient.</i>                                                                                                                                                                                                                                                    | Physiotherapist           |
|            |                                                                                                               | <i>The worry that it won't be giving you the right information and then it's going to skew your thought process and that of others because you can only report on what you're being given.</i>                                                                                                                                                                                                                         | Physiotherapist           |
|            |                                                                                                               | <i>Well overall I suppose if you thought you were doing great and then this pops up you'd kind of get a bit of an oh I've been doing it wrong and you might be put off and you might be like I'm not using that again, but I think that'd be very dramatic.</i>                                                                                                                                                        | Staff Nurse               |
|            |                                                                                                               | <i>The worry that it won't be giving you the right information and then it's going to skew your thought process and that of others because you can only report on what you're being given.</i>                                                                                                                                                                                                                         | Physiotherapist           |
|            |                                                                                                               | <i>There was some issues when I was using it that it wasn't picking up all my reps correctly. So that is an issue. If I was using that at home it would frustrate me if I had done 15 and it said I had done 10.</i>                                                                                                                                                                                                   | Physiotherapist           |

|  |  |                                                                                                                                                                                                                                                                                                                                                                                                                                                                                                                                                                                                                                      |                           |
|--|--|--------------------------------------------------------------------------------------------------------------------------------------------------------------------------------------------------------------------------------------------------------------------------------------------------------------------------------------------------------------------------------------------------------------------------------------------------------------------------------------------------------------------------------------------------------------------------------------------------------------------------------------|---------------------------|
|  |  | <i>It's quite sensitive in that regard but it's better to have it too sensitive than not. The only thing is if it constantly tells the patient the exercise is wrong are they going to say I can't do that exercise right anyway so I'm not doing it and skipping it.</i>                                                                                                                                                                                                                                                                                                                                                            | Physiotherapist           |
|  |  | <i>How it is at the moment it's not picking up the exercises correctly.</i>                                                                                                                                                                                                                                                                                                                                                                                                                                                                                                                                                          | Clinical Nurse Specialist |
|  |  | <i>My issue would be if we use this app after two weeks should we not be progressing their exercises so you're no longer going to be performing those exercises.</i>                                                                                                                                                                                                                                                                                                                                                                                                                                                                 | Physiotherapist           |
|  |  | <i>The only thing is some of the nuances in rehab, it's obviously not going to pick up on. Such as Such as still 3-4/52 post TKR. Still absent in last 10 of knee extension, so they're going to look like they're doing the exercise well, this is going to tell you they're doing the reps of a knee bend well – what's the quality of the knee bend like?</i>                                                                                                                                                                                                                                                                     | Physiotherapist           |
|  |  | <i>You'll always modify the generic programme to a certain person who lacks flexion v extension, strength v ROM.</i>                                                                                                                                                                                                                                                                                                                                                                                                                                                                                                                 | Physiotherapist           |
|  |  | <i>Some people would see that as a tool for assisting self-management, other people no matter how much education or technology you provide, will still see their recovery as incumbent on the healthcare professional looking after them.</i>                                                                                                                                                                                                                                                                                                                                                                                        | Clinical Nurse Specialist |
|  |  | <i>I think the patients that come in with a non-compliant element already, I don't know if you're ever going to change their attitudes and beliefs no matter how much information you provide or give them, or how much resource you provide and give them. I just think there may some way of change in them but I don't know if this app or anything else will be it. I don't know if there is technology out there that is designed that may help them, but again that's unknown.</i>                                                                                                                                             | Staff Nurse               |
|  |  | <i>I guess it depends who is responsible for their care... I wouldn't want alerts about patients who went home a week ago but are in 10/10 pain. I want to educate that patient and put that responsibility on them, the more we give patients the responsibility the better. By doing that alert it makes the patient more passive and we want to encourage the patient to take responsibility, educate them on taking steps like icing and taking pain medication, and then if it still doesn't settle down, then the patient needs to call. I think if we put the responsibility onto us we're leading down a dangerous path.</i> | Physiotherapist           |

1  
2  
3  
4  
5  
6  
7  
8  
9  
10  
11  
12  
13  
14  
15  
16  
17  
18  
19  
20  
21  
22  
23  
24  
25  
26  
27  
28  
29  
30  
31  
32  
33  
34  
35  
36  
37  
38  
39  
40  
41  
42  
43  
44  
45  
46

For peer review only

## SRQR Checklist

| No.                       | Topic                                                                                                                                                                                                                                                                                                                                                                                                |                                                     |
|---------------------------|------------------------------------------------------------------------------------------------------------------------------------------------------------------------------------------------------------------------------------------------------------------------------------------------------------------------------------------------------------------------------------------------------|-----------------------------------------------------|
| <i>Title and abstract</i> |                                                                                                                                                                                                                                                                                                                                                                                                      |                                                     |
| S1                        | <b>Title</b> - Concise description of the nature and topic of the study<br>Identifying the study as qualitative or indicating the approach (e.g., ethnography, grounded theory) or data collection methods (e.g., interview, focus group) is recommended.                                                                                                                                            | Page 1                                              |
| S2                        | <b>Abstract</b> - Summary of key elements of the study using the abstract format of the intended publication; typically includes background, purpose, methods, results, and conclusions                                                                                                                                                                                                              | Page 2<br>Lines 44 – 65                             |
| <i>Introduction</i>       |                                                                                                                                                                                                                                                                                                                                                                                                      |                                                     |
| S3                        | <b>Problem formulation</b> - Description and significance of the problem/phenomenon studied; review of relevant theory and empirical work; problem statement                                                                                                                                                                                                                                         | Page 3                                              |
| S4                        | <b>Purpose or research question</b> - Purpose of the study and specific objectives or questions                                                                                                                                                                                                                                                                                                      | Page 3<br>Lines 123 – 129                           |
| <i>Methods</i>            |                                                                                                                                                                                                                                                                                                                                                                                                      |                                                     |
| S5                        | <b>Qualitative approach or research paradigm</b> - Qualitative approach (e.g., ethnography, grounded theory, case study, phenomenology, narrative research) and guiding theory if appropriate; identifying the research paradigm (e.g., postpositivist, constructivist/ interpretivist) is also recommended; rationale                                                                               | Page 4<br>Lines 176 – 177                           |
| S6                        | <b>Researcher characteristics and reflexivity</b> - Researchers' characteristics that may influence the research, including personal attributes, qualifications/experience, relationship with participants, assumptions, and/or presuppositions; potential or actual interaction between researchers' characteristics and the research questions, approach, methods, results, and/or transferability | Page 4<br>Lines 177 – 183                           |
| S7                        | <b>Context</b> - Setting/site and salient contextual factors; rationale                                                                                                                                                                                                                                                                                                                              | Page 4<br>Lines 138 – 140                           |
| S8                        | <b>Sampling Strategy</b> - How and why research participants, documents, or events were selected; criteria for deciding when no further sampling was necessary (e.g., sampling saturation); rationale                                                                                                                                                                                                | Pages 4-5<br>Lines 138 – 140.<br>Lines 181 – 183    |
| S9                        | <b>Ethical issues pertaining to human subjects</b> - Documentation of approval by an appropriate ethics review board and participant consent, or explanation for lack thereof; other confidentiality and data security issues                                                                                                                                                                        | Page 4<br>Lines 140 – 142                           |
| S10                       | <b>Data collection methods</b> - Types of data collected; details of data collection procedures including (as appropriate) start and stop dates of data collection and analysis, iterative process, triangulation of sources/methods, and modification of procedures in response to evolving study findings; rationale                                                                               | Pages 4-5<br>Lines 144 – 155.<br>Lines 175 – 183    |
| S11                       | <b>Data collection instruments and technologies</b> - Description of instruments (e.g., interview guides, questionnaires) and devices (e.g., audio recorders) used for data collection; if/how the instrument(s) changed over the course of the study                                                                                                                                                | Page 4<br>Lines 145 – 148.<br>Supplementary file 1. |
| S12                       | <b>Units of study</b> - Number and relevant characteristics of participants, documents, or events included in the study; level of participation (could be reported in results)                                                                                                                                                                                                                       | Page 4<br>Lines 136 – 138                           |

|                         |                                                                                                                                                                                                                                                                                                                                                                                                            |                                             |
|-------------------------|------------------------------------------------------------------------------------------------------------------------------------------------------------------------------------------------------------------------------------------------------------------------------------------------------------------------------------------------------------------------------------------------------------|---------------------------------------------|
| S13                     | <b>Data processing</b> - Methods for processing data prior to and during analysis, including transcription, data entry, data management and security, verification of data integrity, data coding, and anonymization/de-identification of excerpts                                                                                                                                                         | Page 5<br>Lines 175 – 183                   |
| S14                     | <b>Data analysis</b> - Process by which inferences, themes, etc., were identified and developed, including the researchers involved in data analysis; usually references a specific paradigm or approach; rationale                                                                                                                                                                                        | Page 5<br>Lines 175 – 183                   |
| S15                     | <b>Techniques to enhance trustworthiness</b> - Techniques to enhance trustworthiness and credibility of data analysis (e.g., member checking, audit trail, triangulation); rationale                                                                                                                                                                                                                       | Page 5<br>Lines 175 – 183                   |
| <i>Results/findings</i> |                                                                                                                                                                                                                                                                                                                                                                                                            |                                             |
| S16                     | <b>Synthesis and interpretation</b> - Main findings (e.g., interpretations, inferences, and themes); might include development of a theory or model, or integration with prior research or theory                                                                                                                                                                                                          | Pages 5 – 9                                 |
| S17                     | <b>Links to empirical data</b> - Evidence (e.g., quotes, field notes, text excerpts, photographs) to substantiate analytic findings                                                                                                                                                                                                                                                                        | Pages 5 – 9 and<br>Supplementary<br>file 2. |
| <i>Discussion</i>       |                                                                                                                                                                                                                                                                                                                                                                                                            |                                             |
| S18                     | <b>Integration with prior work, implications, transferability and contribution(s) to the field</b> - Short summary of main findings; explanation of how findings and conclusions connect to, support, elaborate on, or challenge conclusions of earlier scholarship; discussion of scope of application/generalizability; identification of unique contribution(s) to scholarship in a discipline or field | Pages 9 – 11                                |
| S19                     | <b>Limitations</b> - Trustworthiness and limitations of findings                                                                                                                                                                                                                                                                                                                                           | Page 11<br>Lines 469 – 481.                 |
| <i>Other</i>            |                                                                                                                                                                                                                                                                                                                                                                                                            |                                             |
| S20                     | <b>Conflicts of interest</b> - Potential sources of influence or perceived influence on study conduct and conclusions; how these were managed                                                                                                                                                                                                                                                              | Page 12<br>Lines 510 – 511                  |
| S21                     | <b>Funding</b> - Sources of funding and other support; role of funders in data collection, interpretation, and reporting                                                                                                                                                                                                                                                                                   | Page 12<br>Lines 513 – 517                  |
