# Supplementary material for: Clinician perceptions of a prototype wearable exercise biofeedback system for orthopaedic rehabilitation: a qualitative exploration
Source: PubMed Central journal article supplement — BMJ Open. 2018 Oct 25;8(10):e026326. doi: 10.1136/bmjopen-2018-026326 (PMC6224760; doi:10.1136/bmjopen-2018-026326), 2018-10-25
Supplement: bmjopen-2018-026326supp001.pdf [file bmjopen-2018-026326supp001.pdf]

## SUPPLEMENTAL FILE 1: INTERVIEW TOPIC GUIDE

**Main questions formed the core structure of the interview, further follow-up questions were put forward dependent on initial response.**

- What methods would you currently use for monitoring and feedback during patient rehabilitation?

*Example of follow-up questions:*

- *What about outside of the clinic?*
- *When do you employ these methods?*
- *Does that provide the information that you need? Why?*

- Do you know anything about wearable technology?

*Example of follow-up questions:*

- *If so tell me what you know, how they're used and your view of them.*
- *Why do you have that view of them?*
- *What do you think are the benefits / drawbacks of those you're aware of?*

- What do you think are the opportunities of using technology in orthopaedic rehabilitation?

*Example of follow-up questions:*

- *Have you been involved in / are you aware of any projects taking place?*
- *Why do you think technology might help in that instance?*

- Equally what do you think are the challenges?

*Example of follow-up questions:*

- *What do you think the risk would be when encountering that challenge?*
- *How do you think those challenges could be overcome?*

- What do you think of the role of mobile phones and tablets in monitoring of patients?

*Example of follow-up questions:*

- *You say you think it'd be useful, in what way could it help?*
- *Why do you think smart phones can play that role?*

### DEMONSTRATION OF EXEMPLAR SYSTEM PROVIDED

- Having used this technology, what do you think about using software like this for this purpose?

*Example of follow-up questions:*

- *Why does this system have that effect?*
- *You think it'll improve the quality of rehabilitation – How?*

- How did you find using this particular application?
- What impact do you think this could have for patient rehabilitation?

*Example of follow-up questions:*

- *And what about any impact on your practice?*
- *How do you see the difference using that might have on the way you work?*

- Based on your experience, what could be improved in the system?

*Example of follow-up questions:*

- *What did you think about the way the information was presented in the app?*
- *Did you encounter any difficulties whilst using the software, any tasks that you found difficult or technical issues?*
- *How would you comment on the user experience of the system?*
- *What else needs to be considered in the design of the system?*
